# Supplementary material
Source: ML conference proceedings conference paper supplement (https://openreview.net/forum?id=Rtd6GoJcoT)
Supplement: supplementary_material [file Data_Source.xlsx]

## Sheet: Sheet1
Study Name
