# Supplementary material
Source: ML conference proceedings conference paper supplement (https://openreview.net/forum?id=Rtd6GoJcoT)
Supplement: supplementary_material [file visualization-main.pdf › Orochi_Supplementary/figures/visualization-main.pdf]

Nosiy

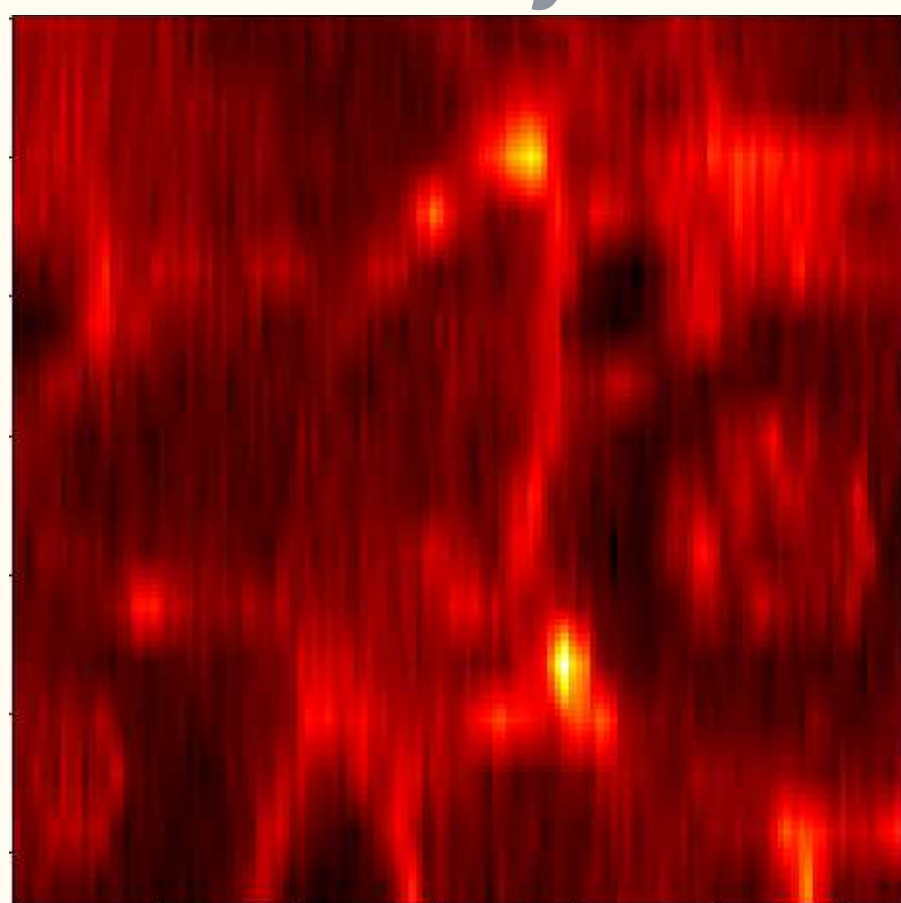

UniFMIR

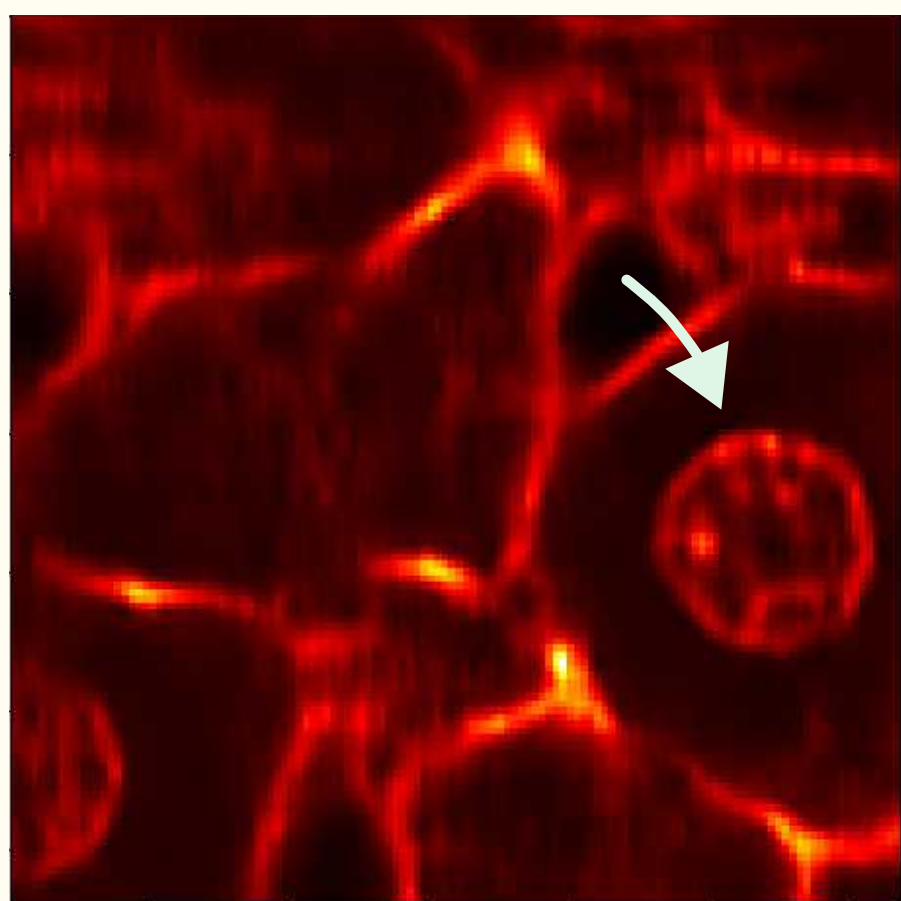

High Laser (GT)

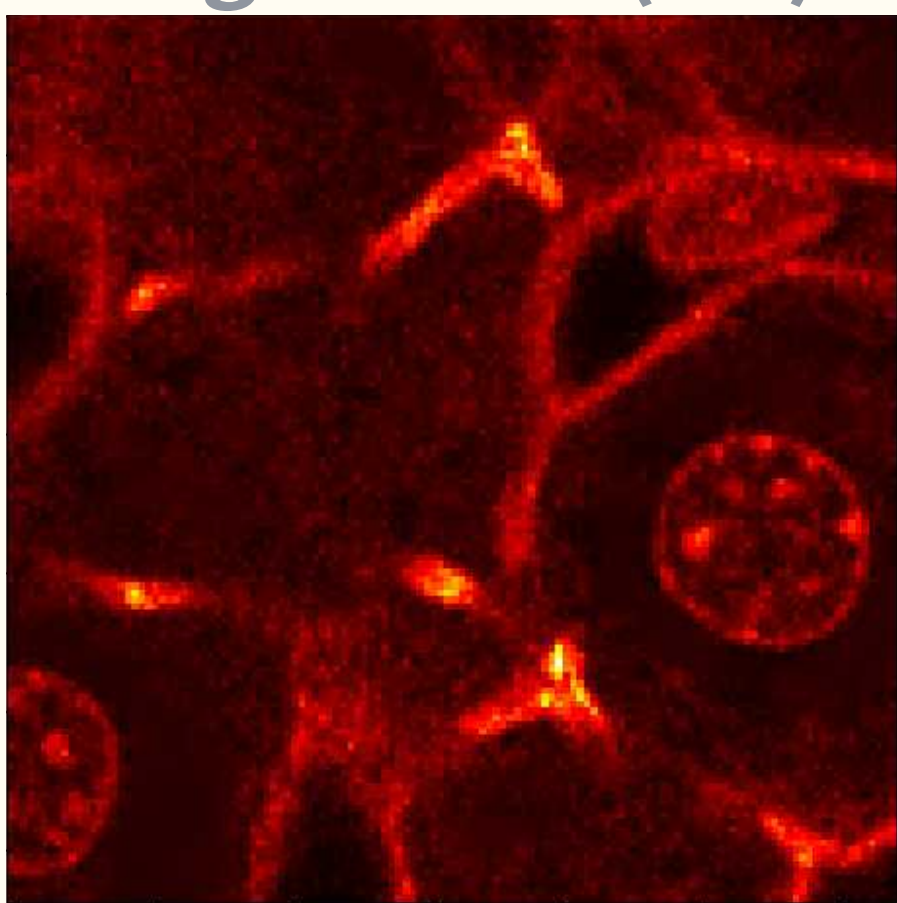

Orochi

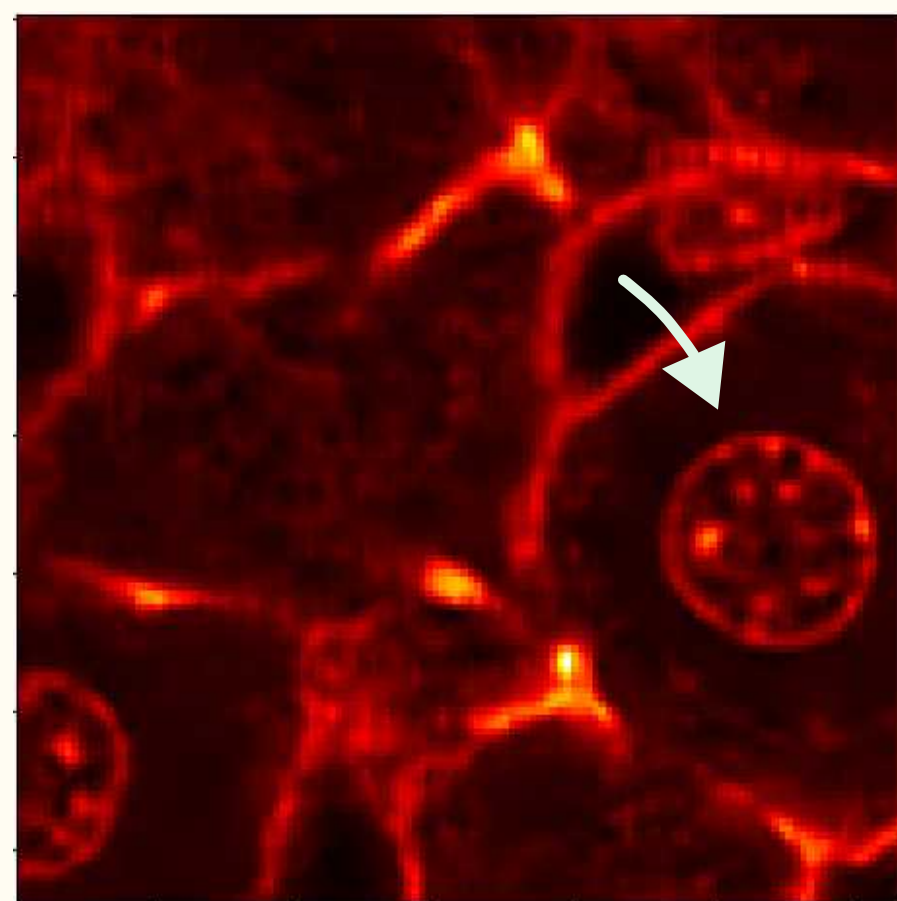

Restoration

Low-Res

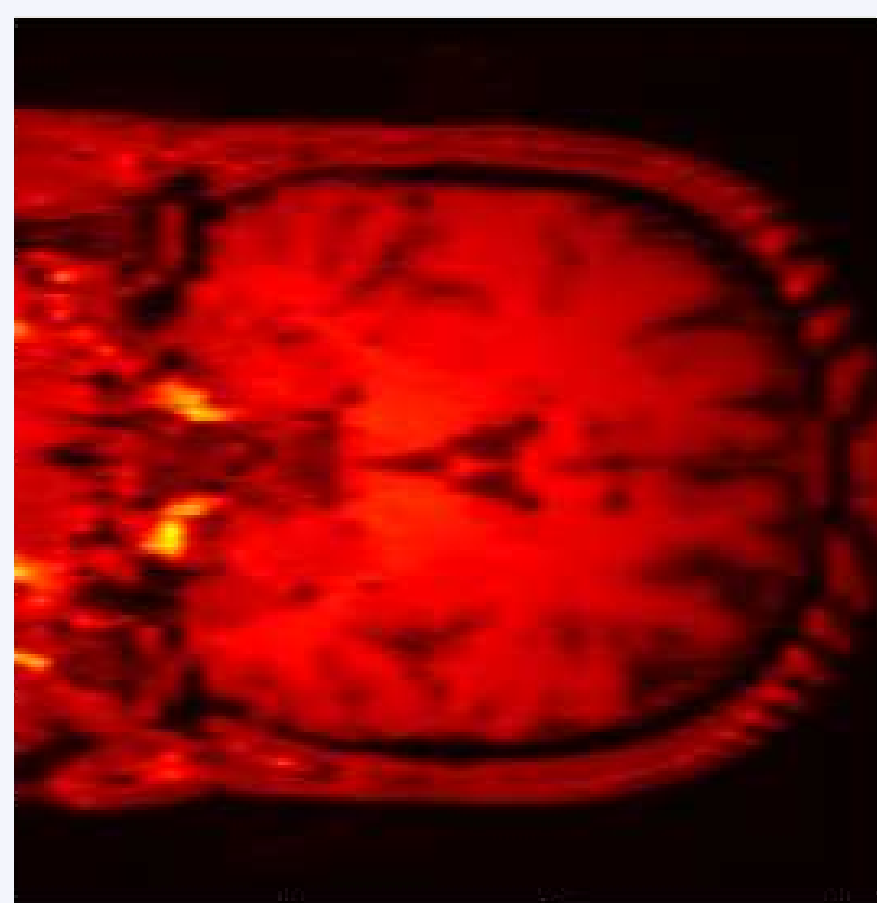

VCM

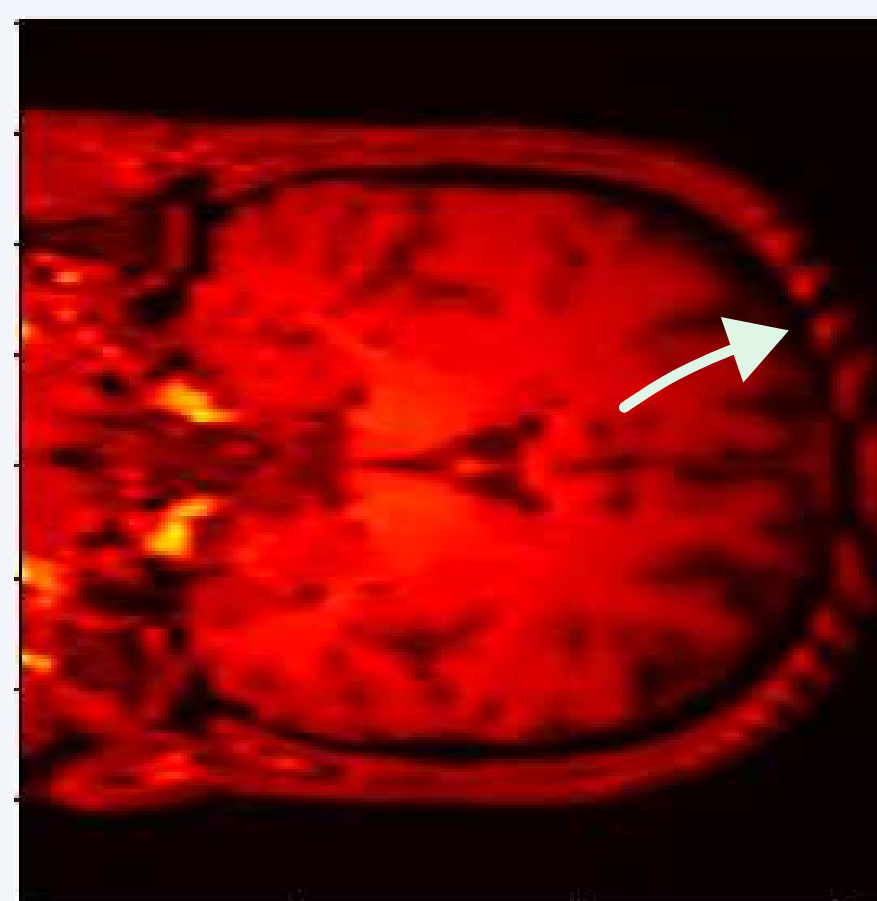

High-Res (GT)

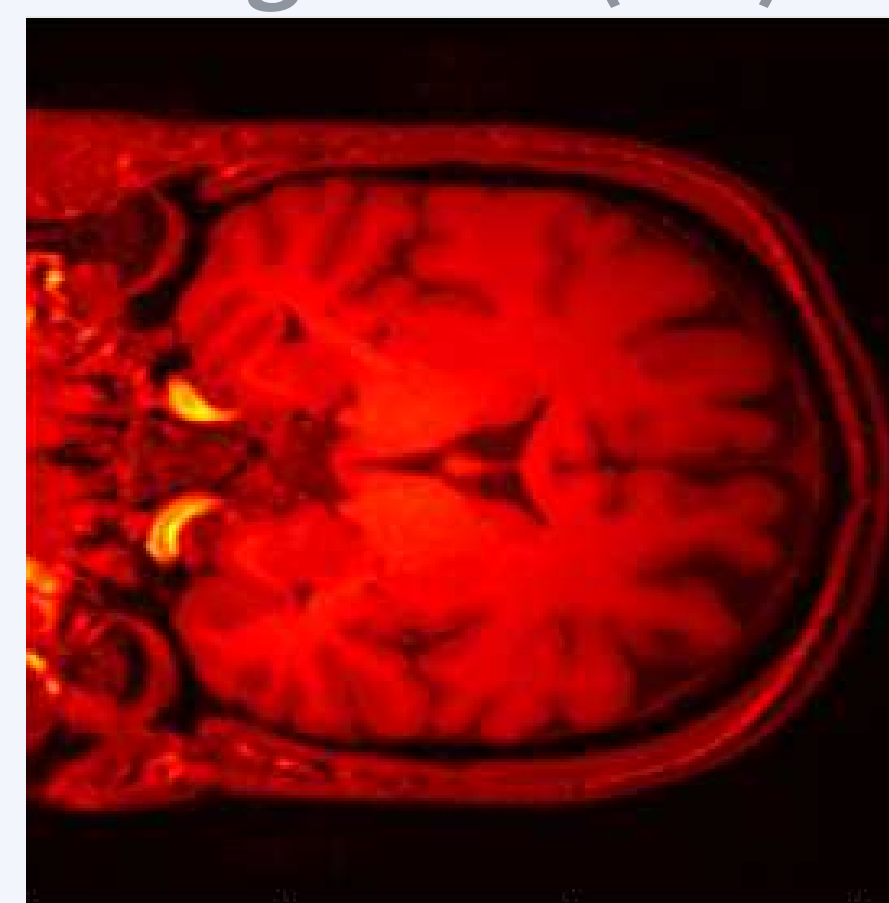

Orochi

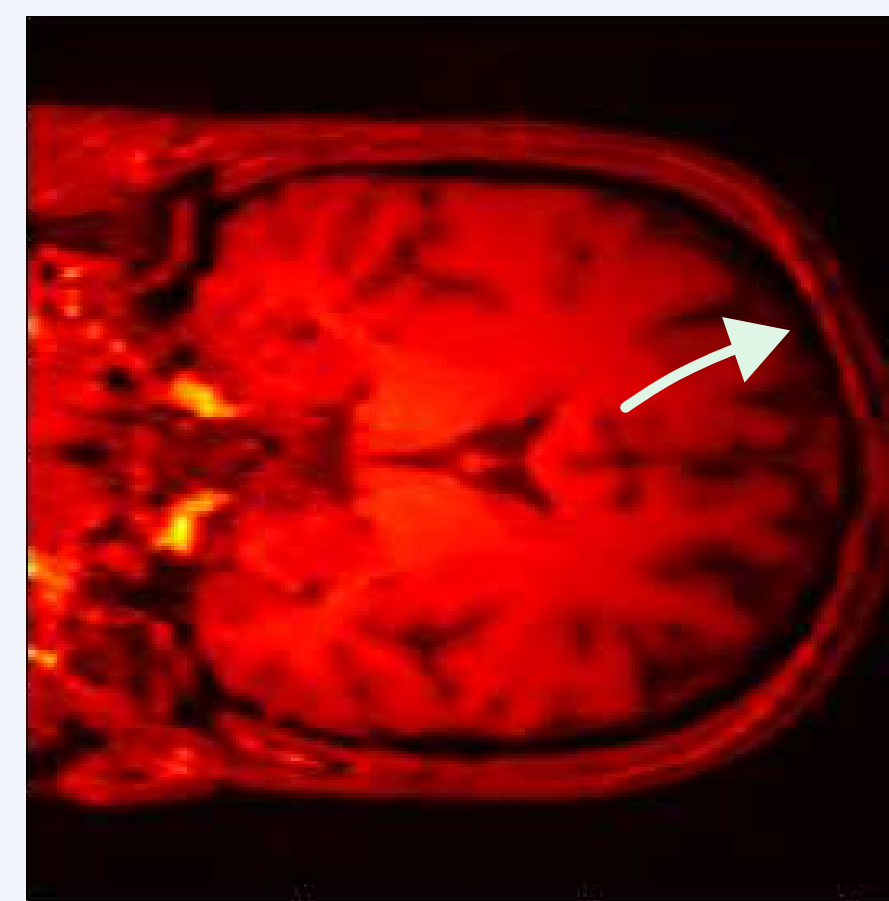

Super-resolution

Fix

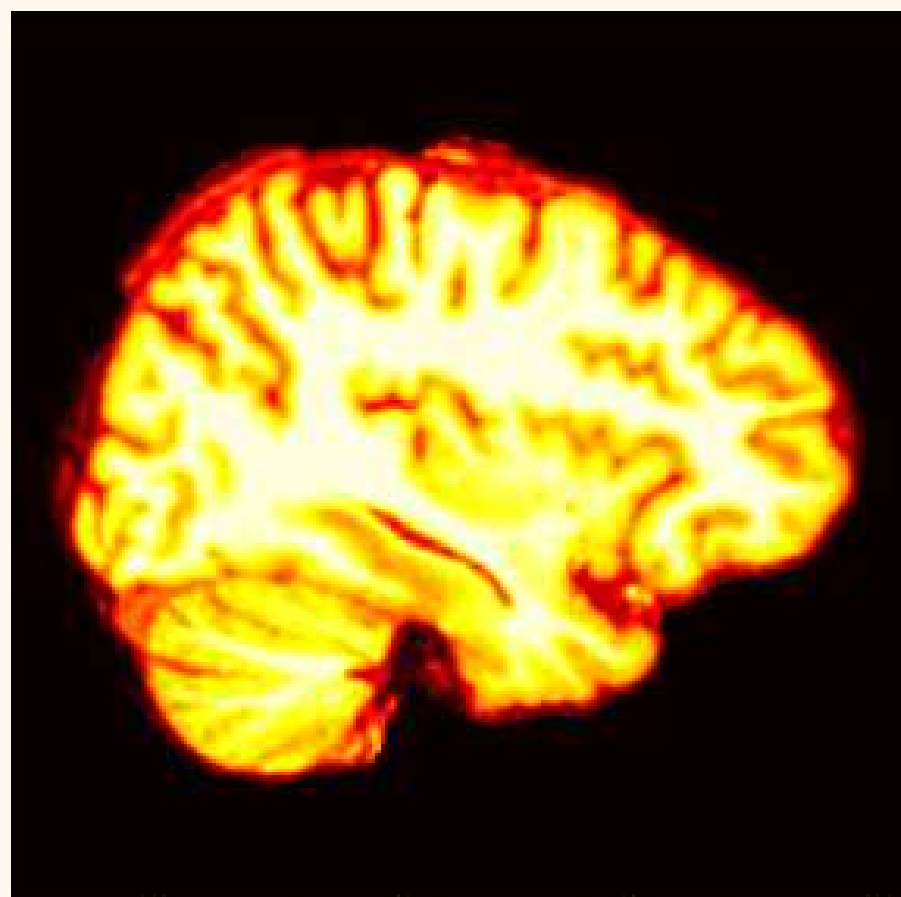

Mambamorph

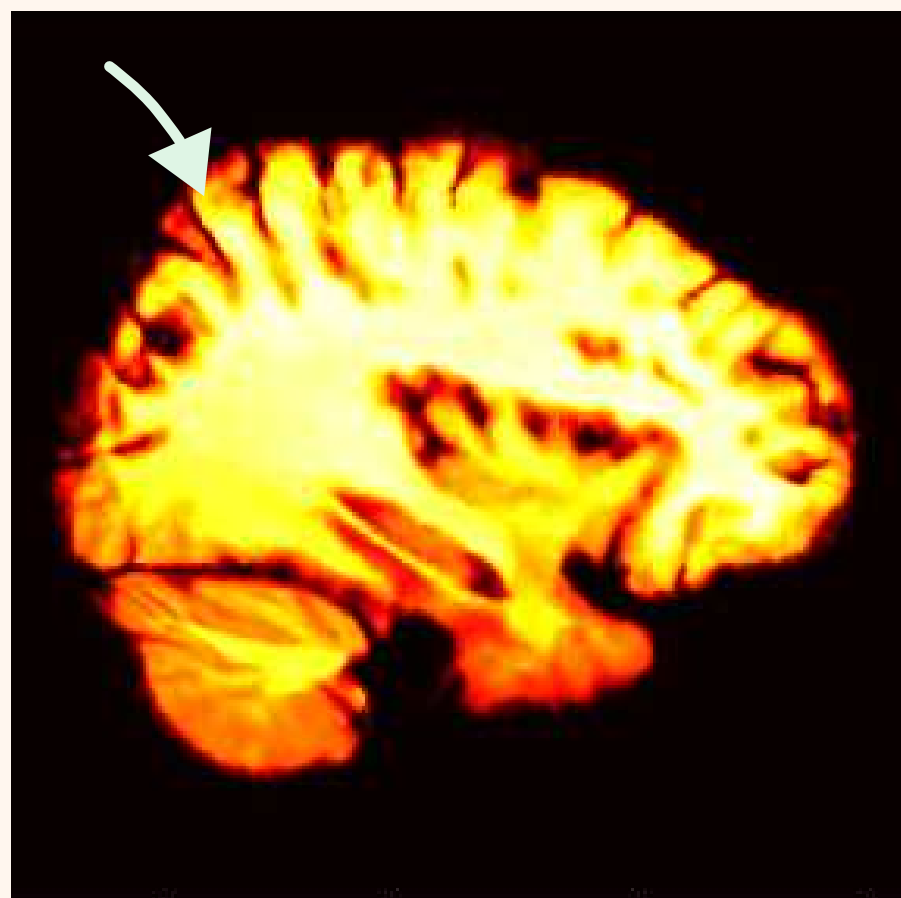

Move

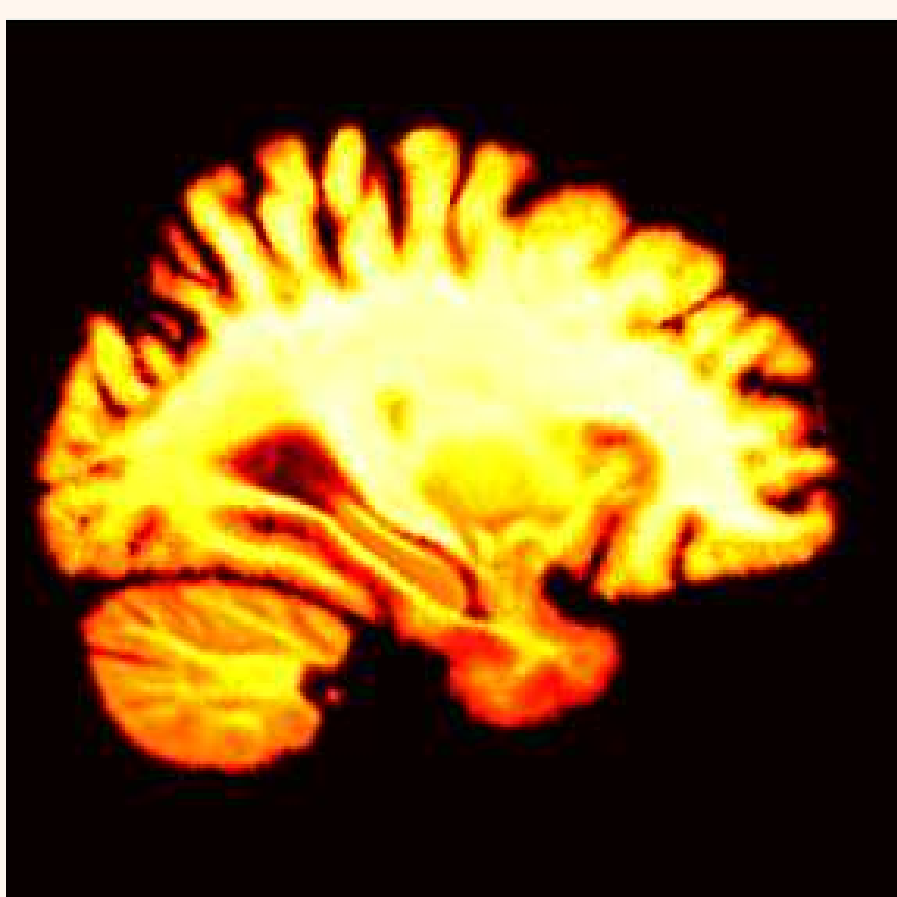

Orochi

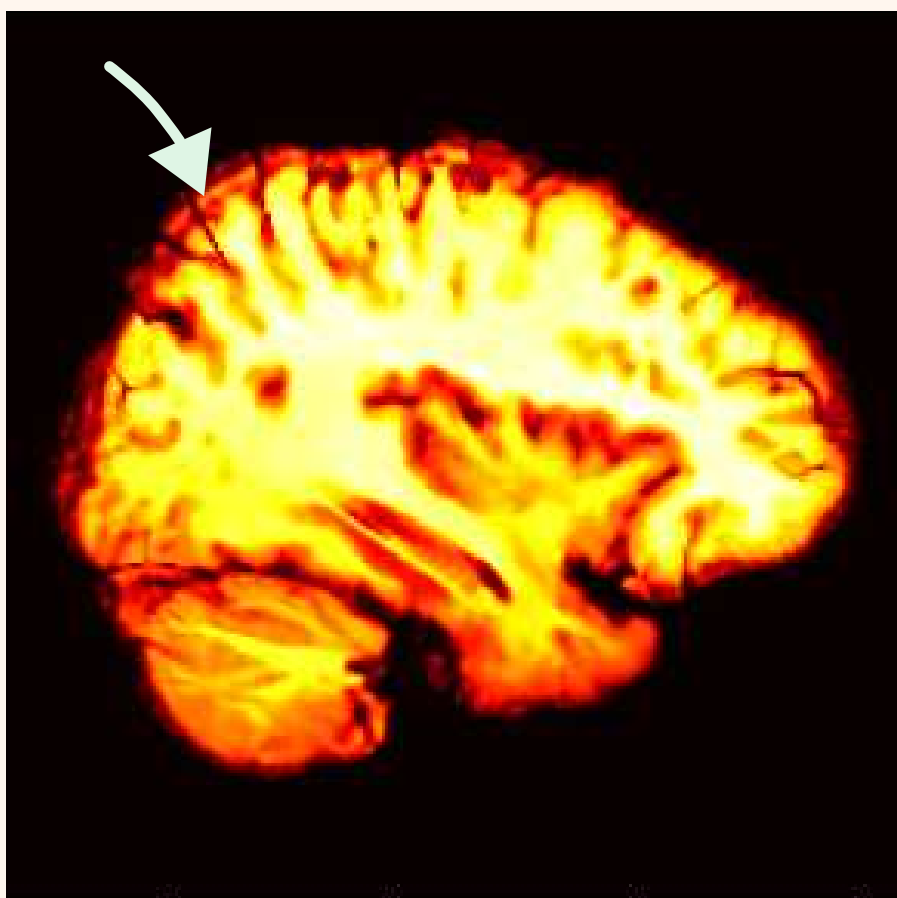

Registration

CT

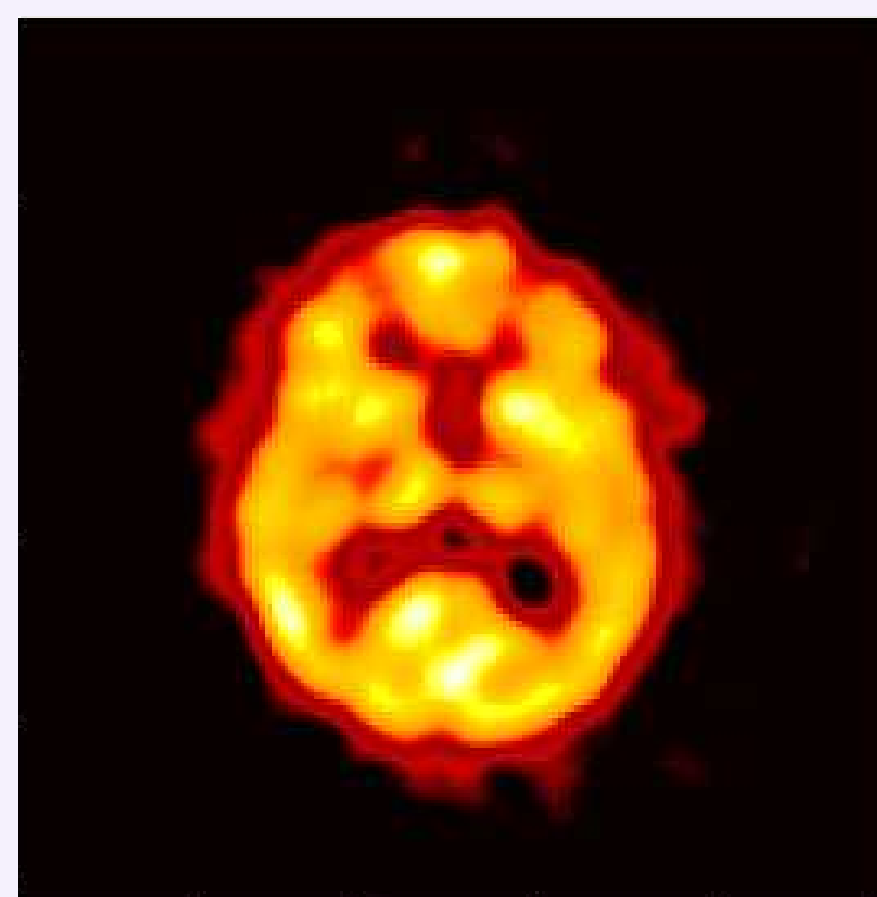

BSAFusion

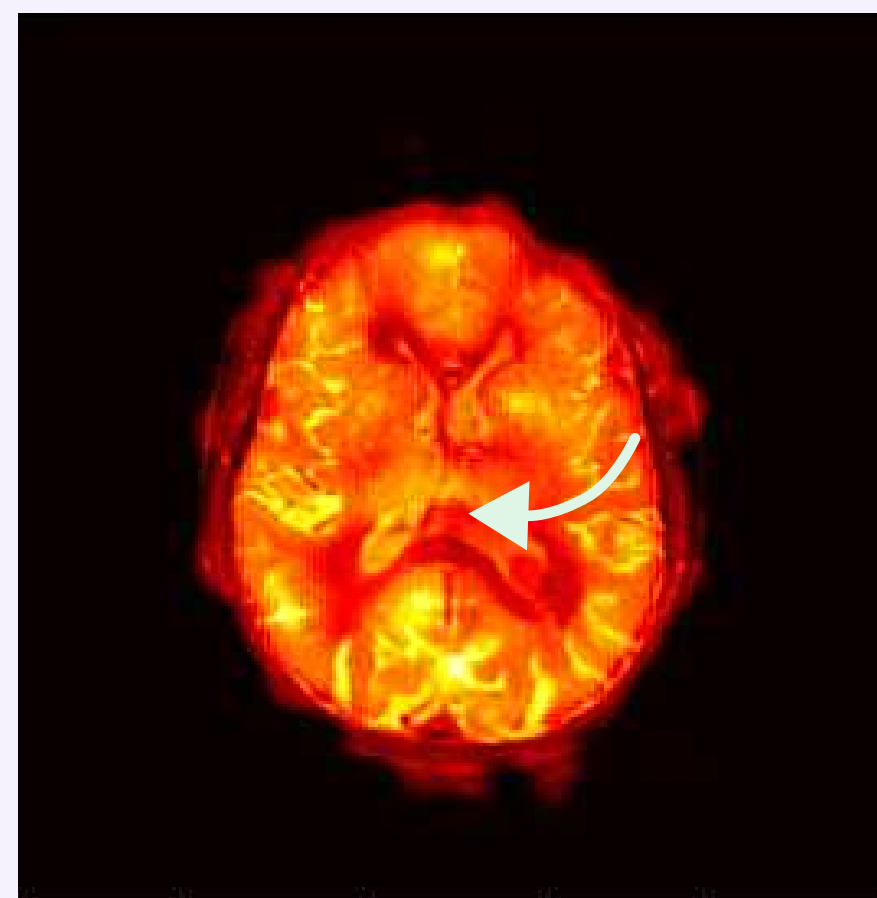

MRI

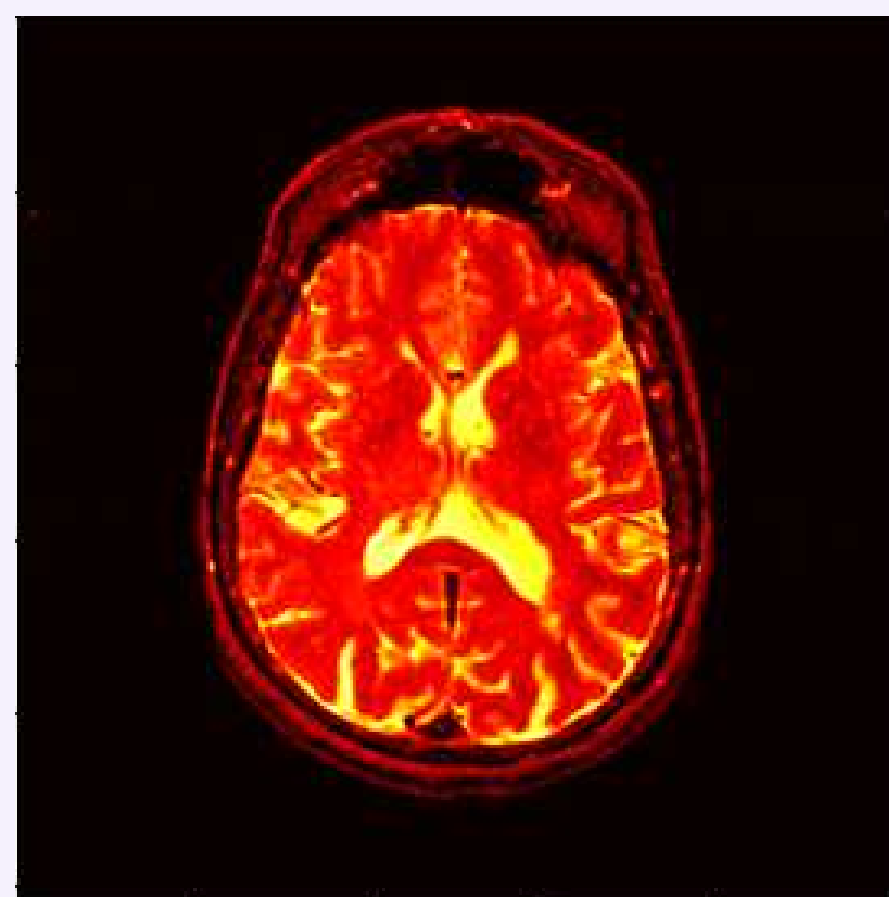

Orochi

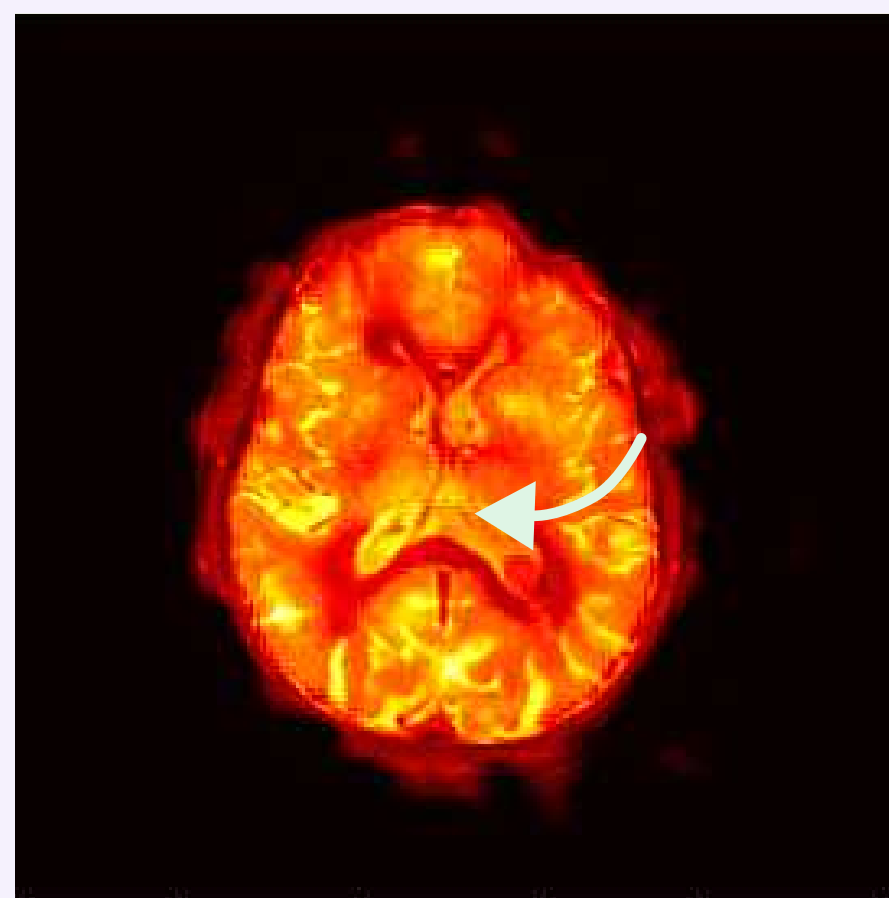

Fusion
