# Supplementary material
Source: ML conference proceedings conference paper supplement (https://openreview.net/forum?id=Rtd6GoJcoT)

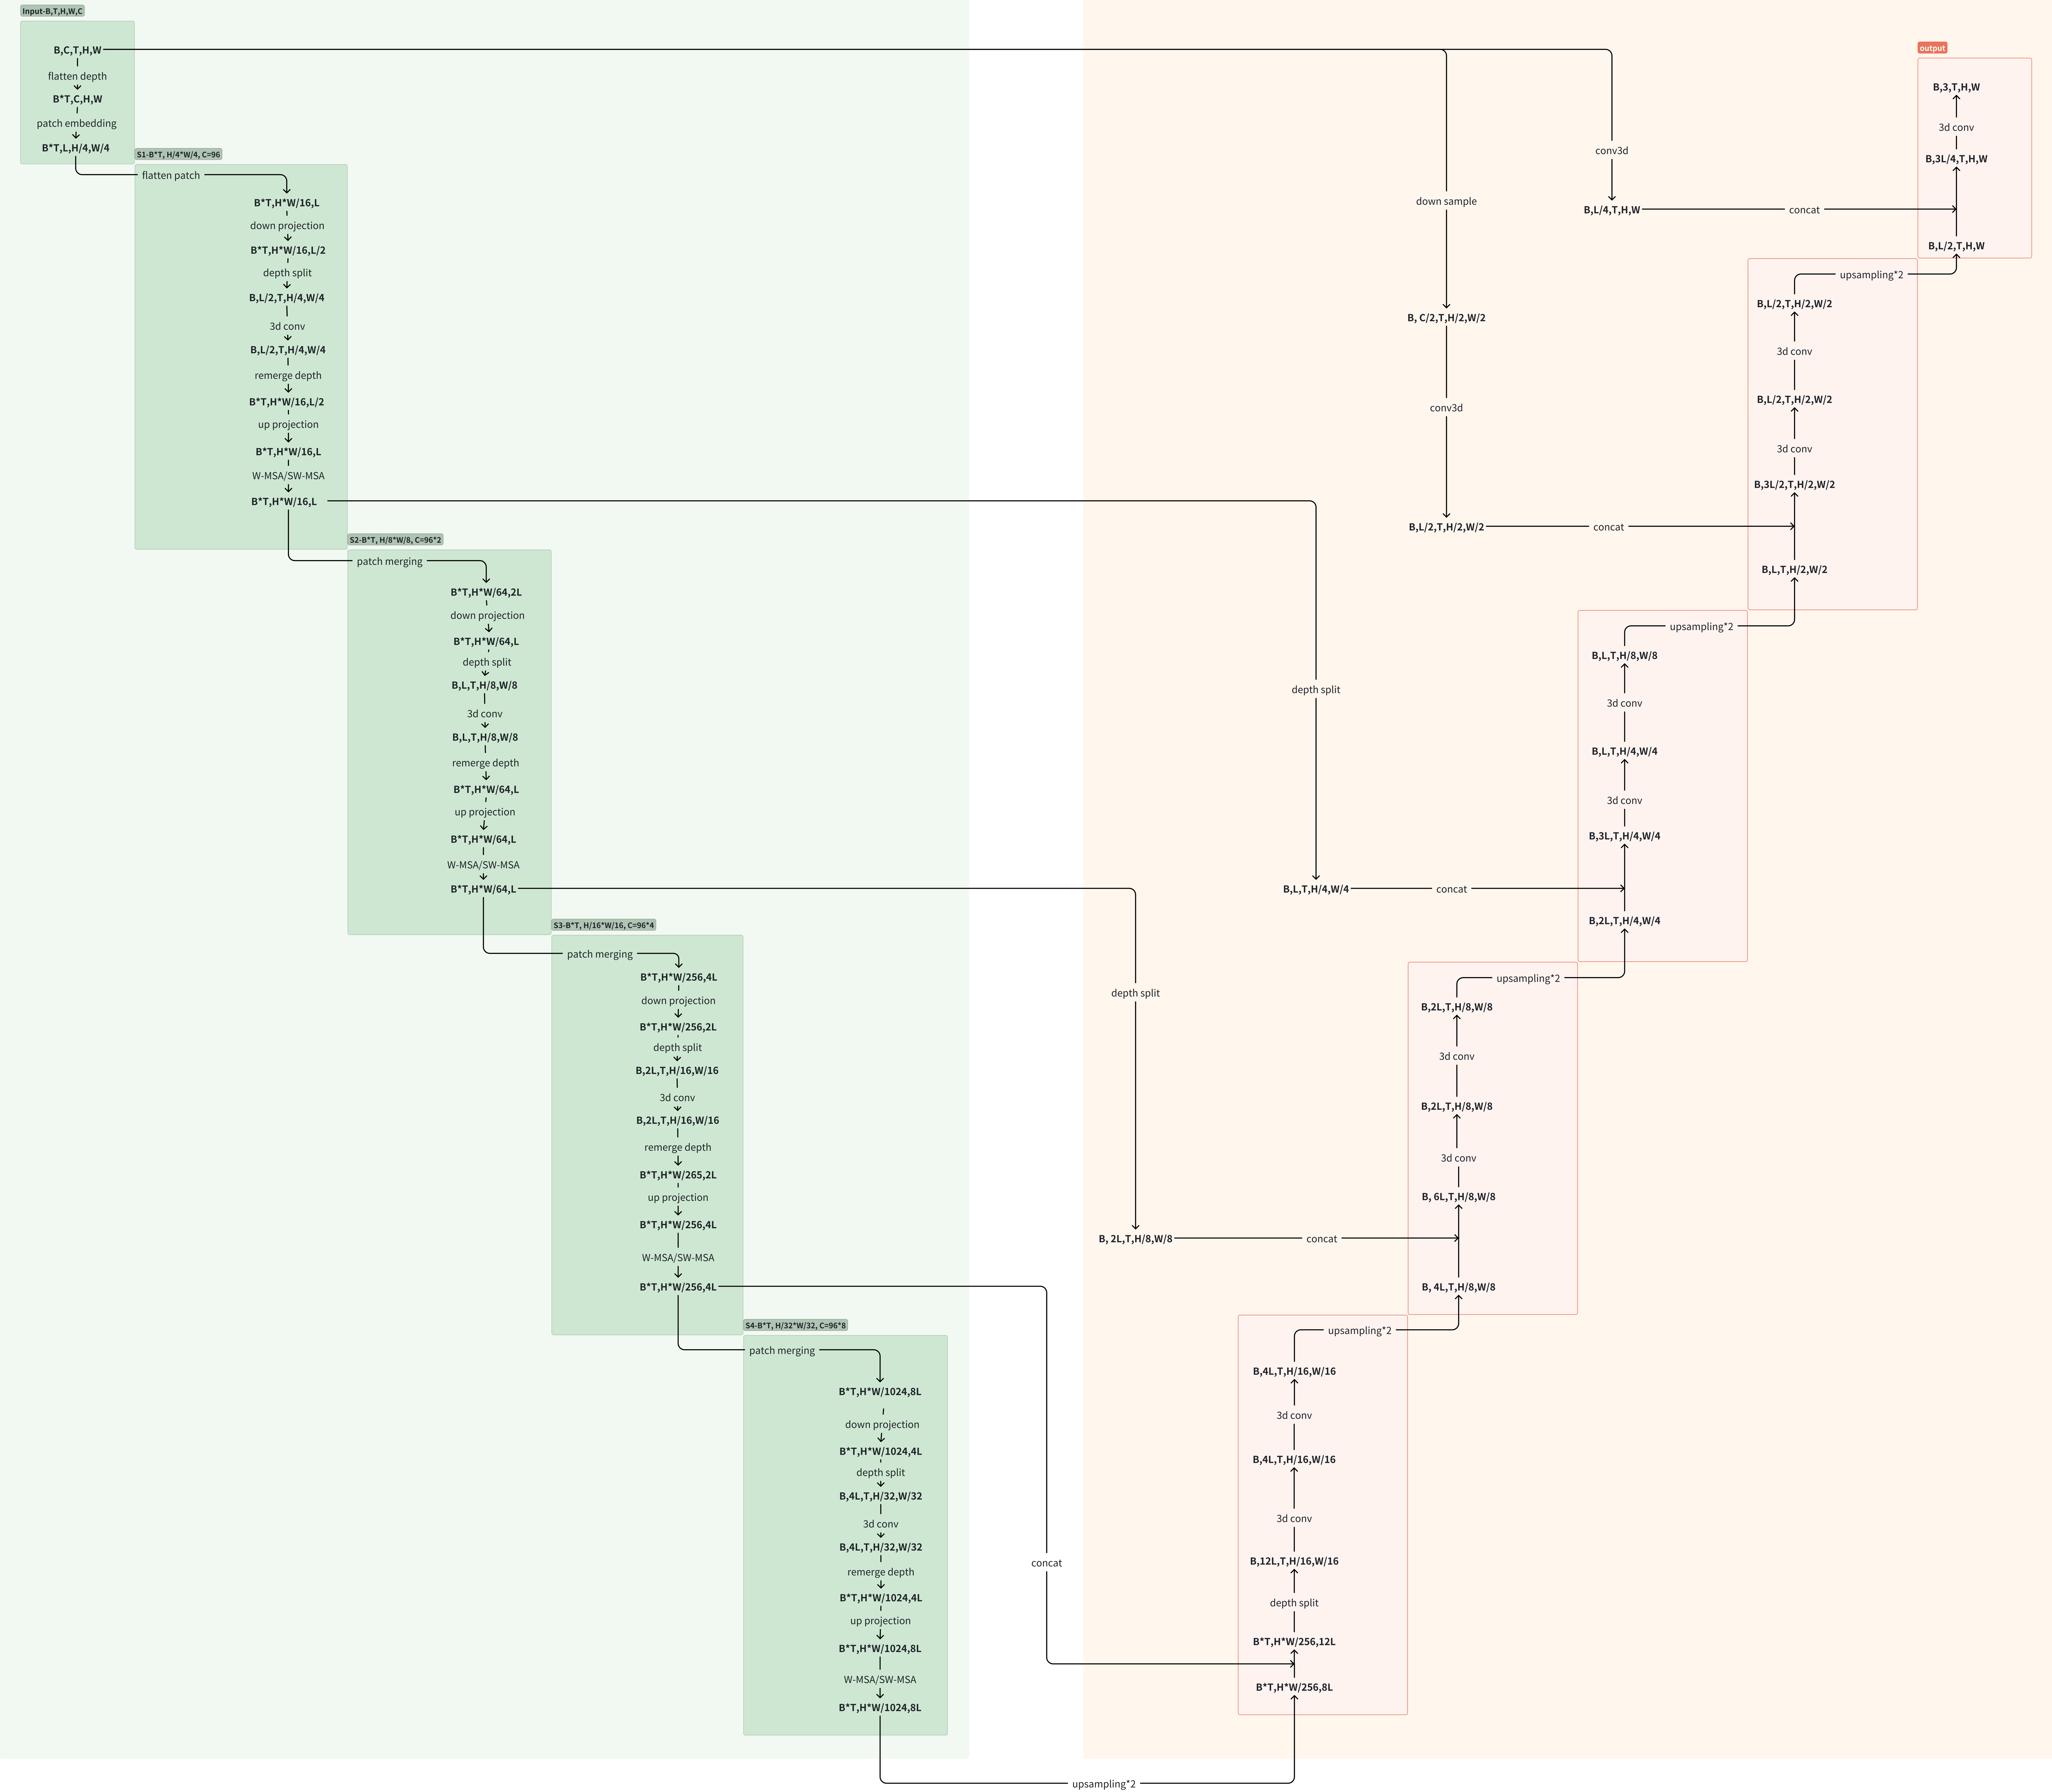

Supplement: supplementary_material [file MHM-appendix.pdf › Orochi_Supplementary/figures/MHM-appendix.pdf]

## Dataset: OASIS

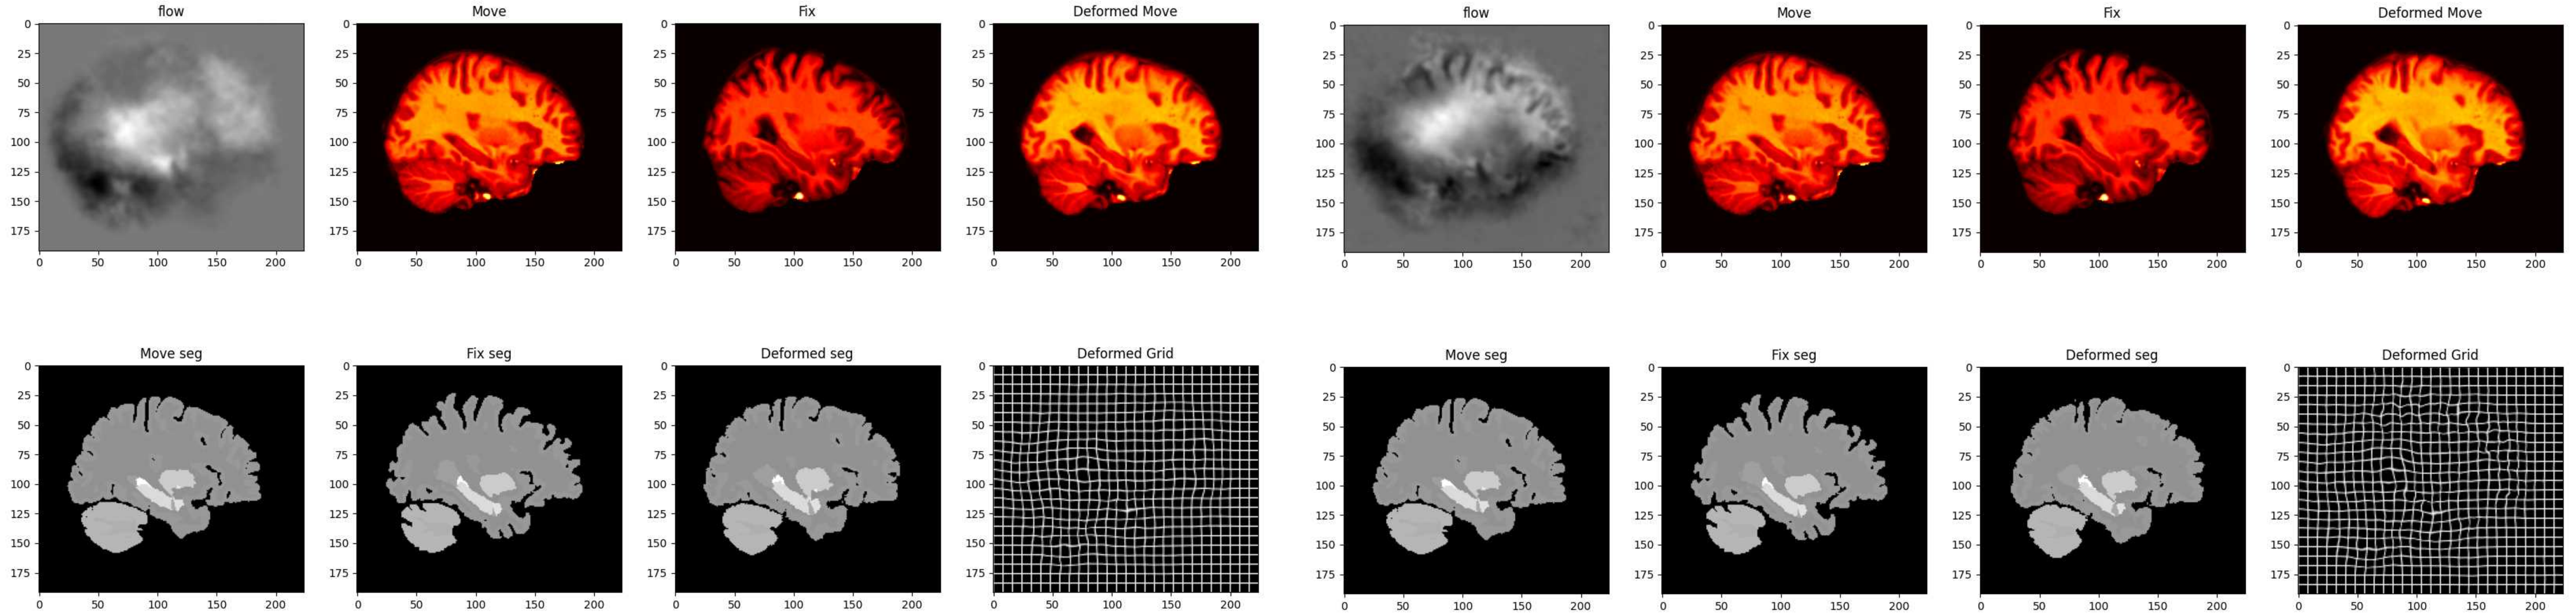

SuperFusion (JAS22) - Dice: 0.66

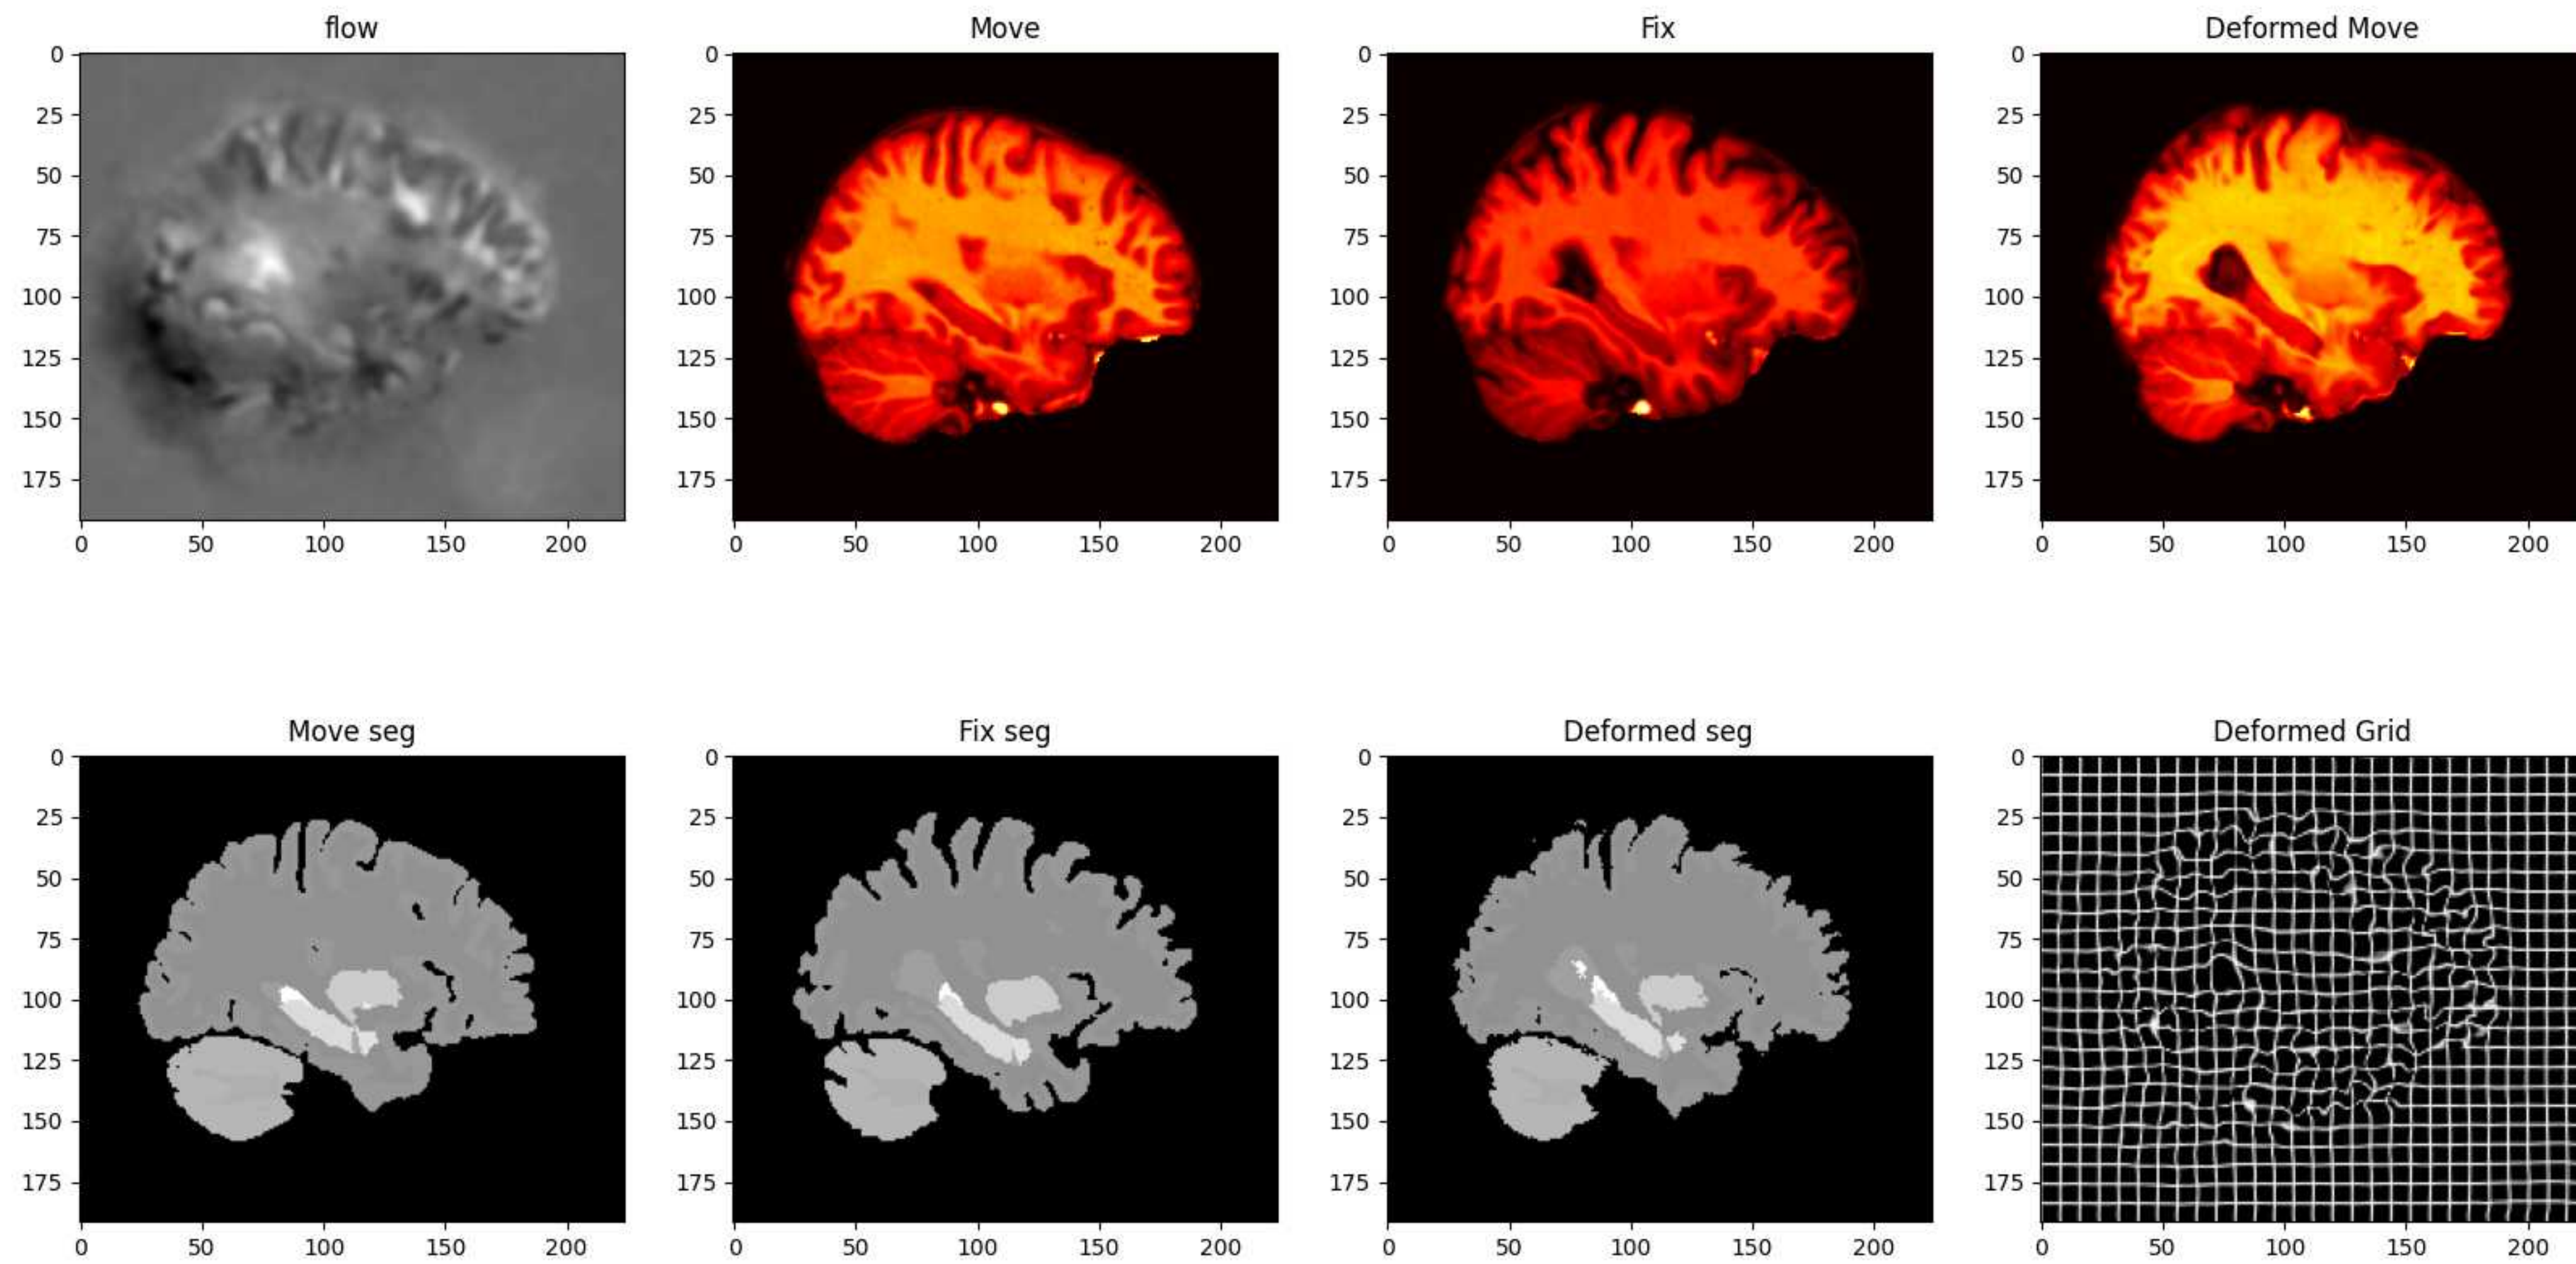

MURF (TPAMI23) - Dice: 0.67

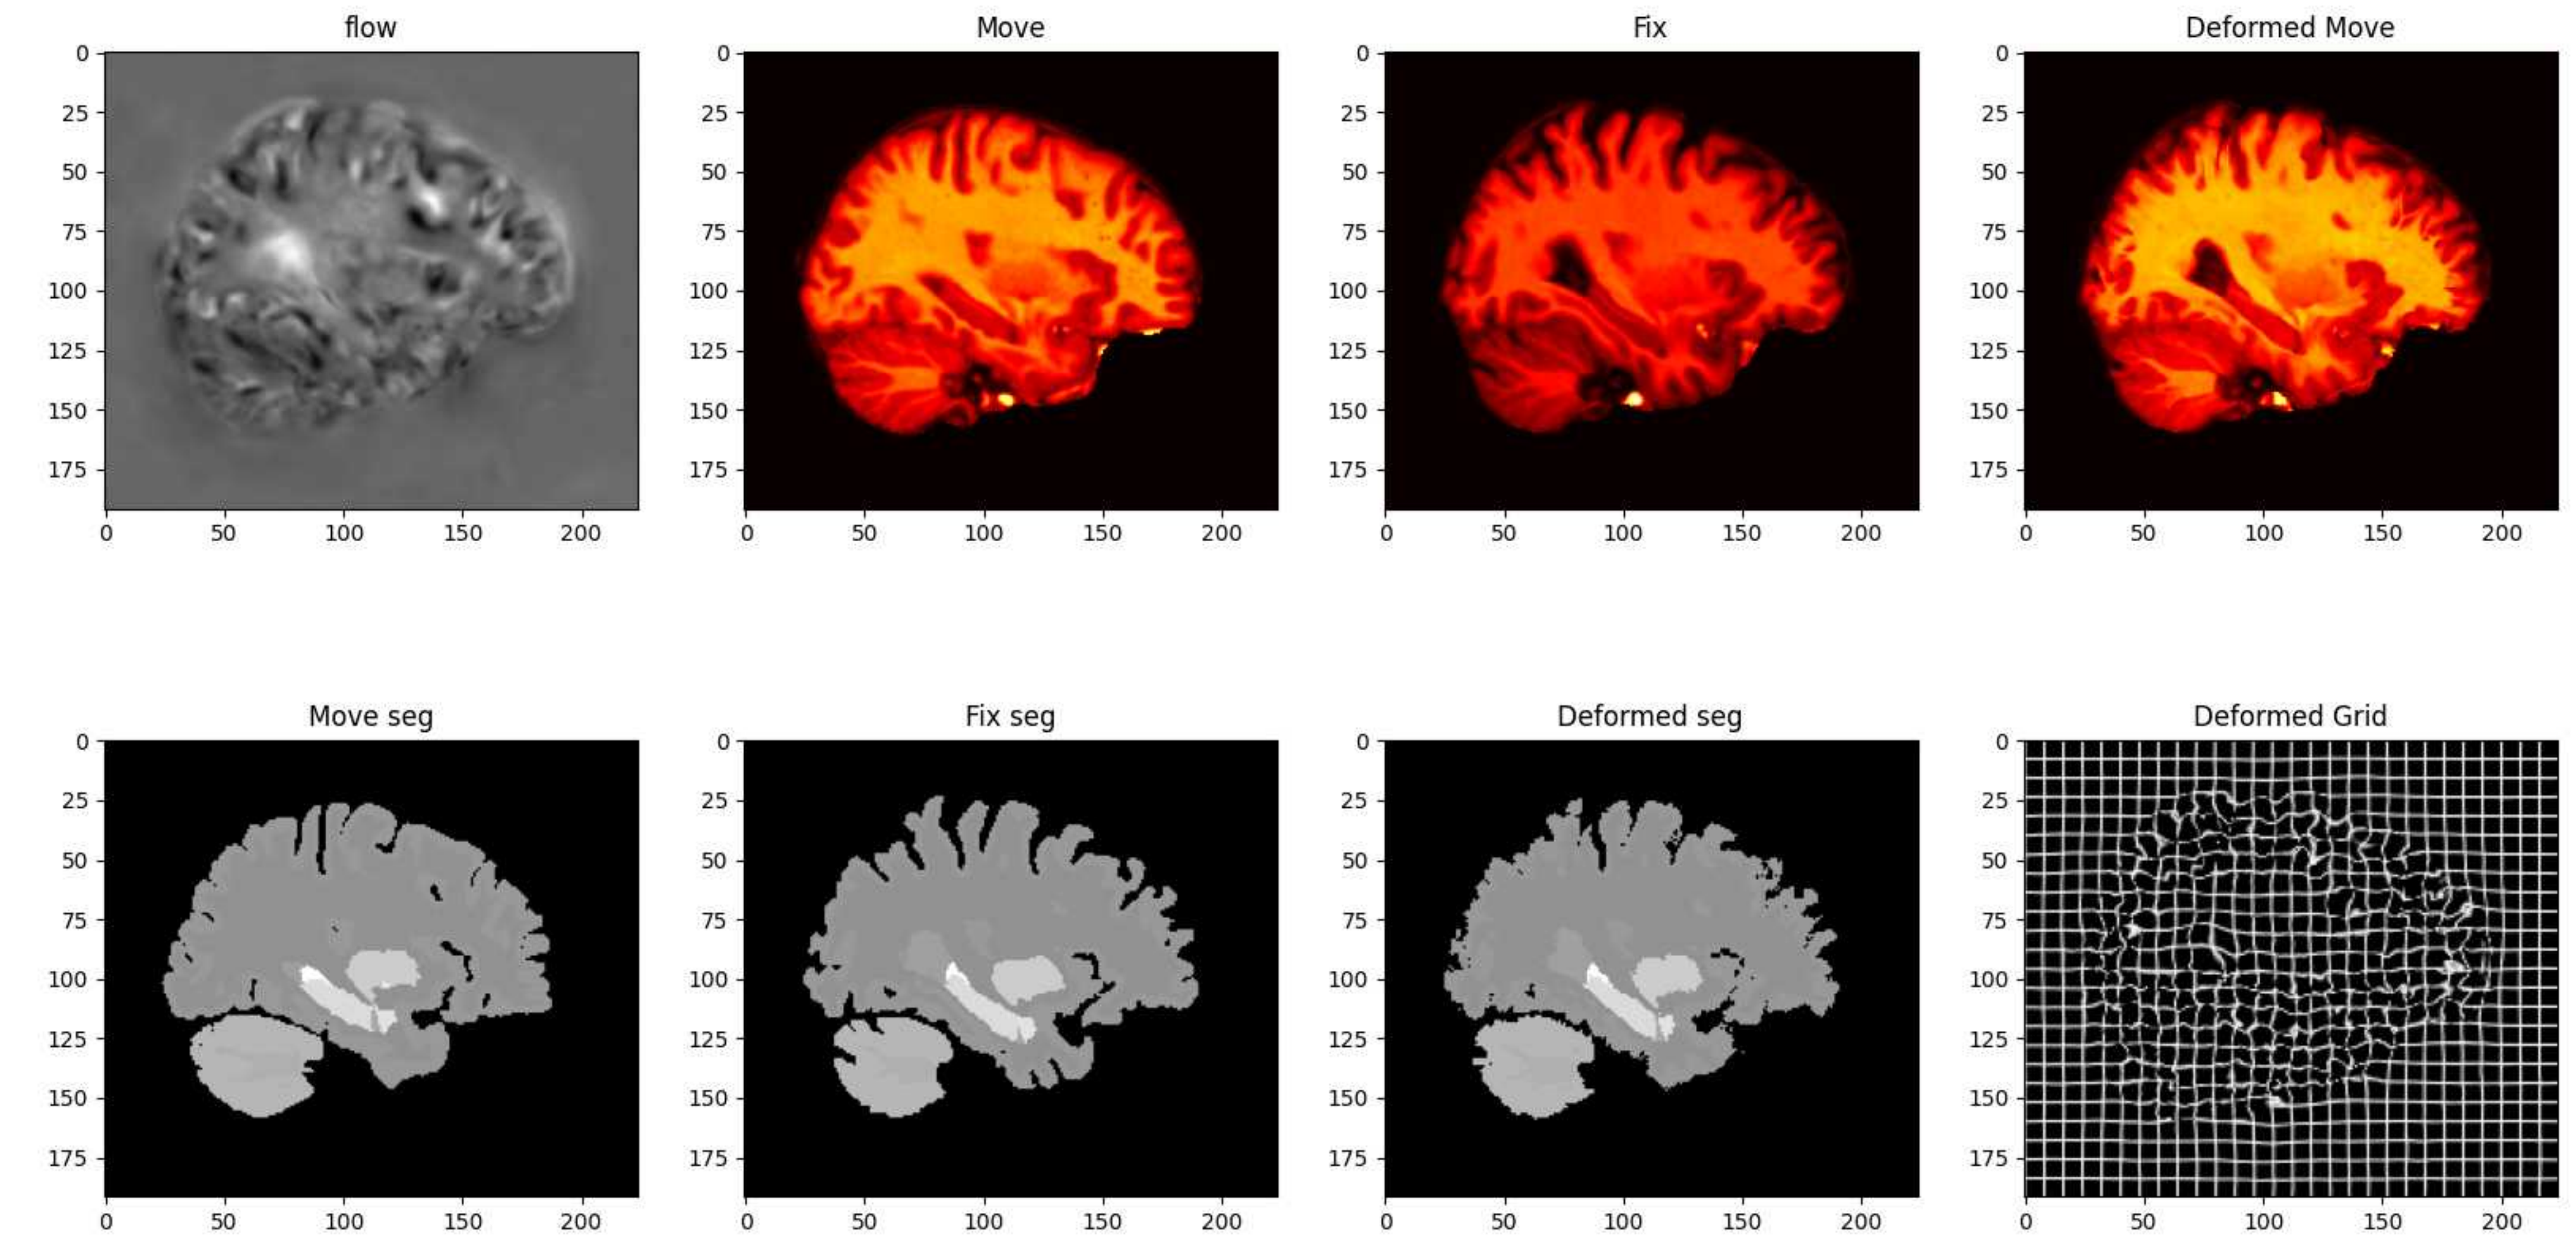

BSAFusion (AAAI25) - Dice: 0.69

Orochi (Ours) - Dice: 0.81

Supplement: supplementary_material [file fusion-on-reg-appendix.pdf › Orochi_Supplementary/figures/fusion-on-reg-appendix.pdf]

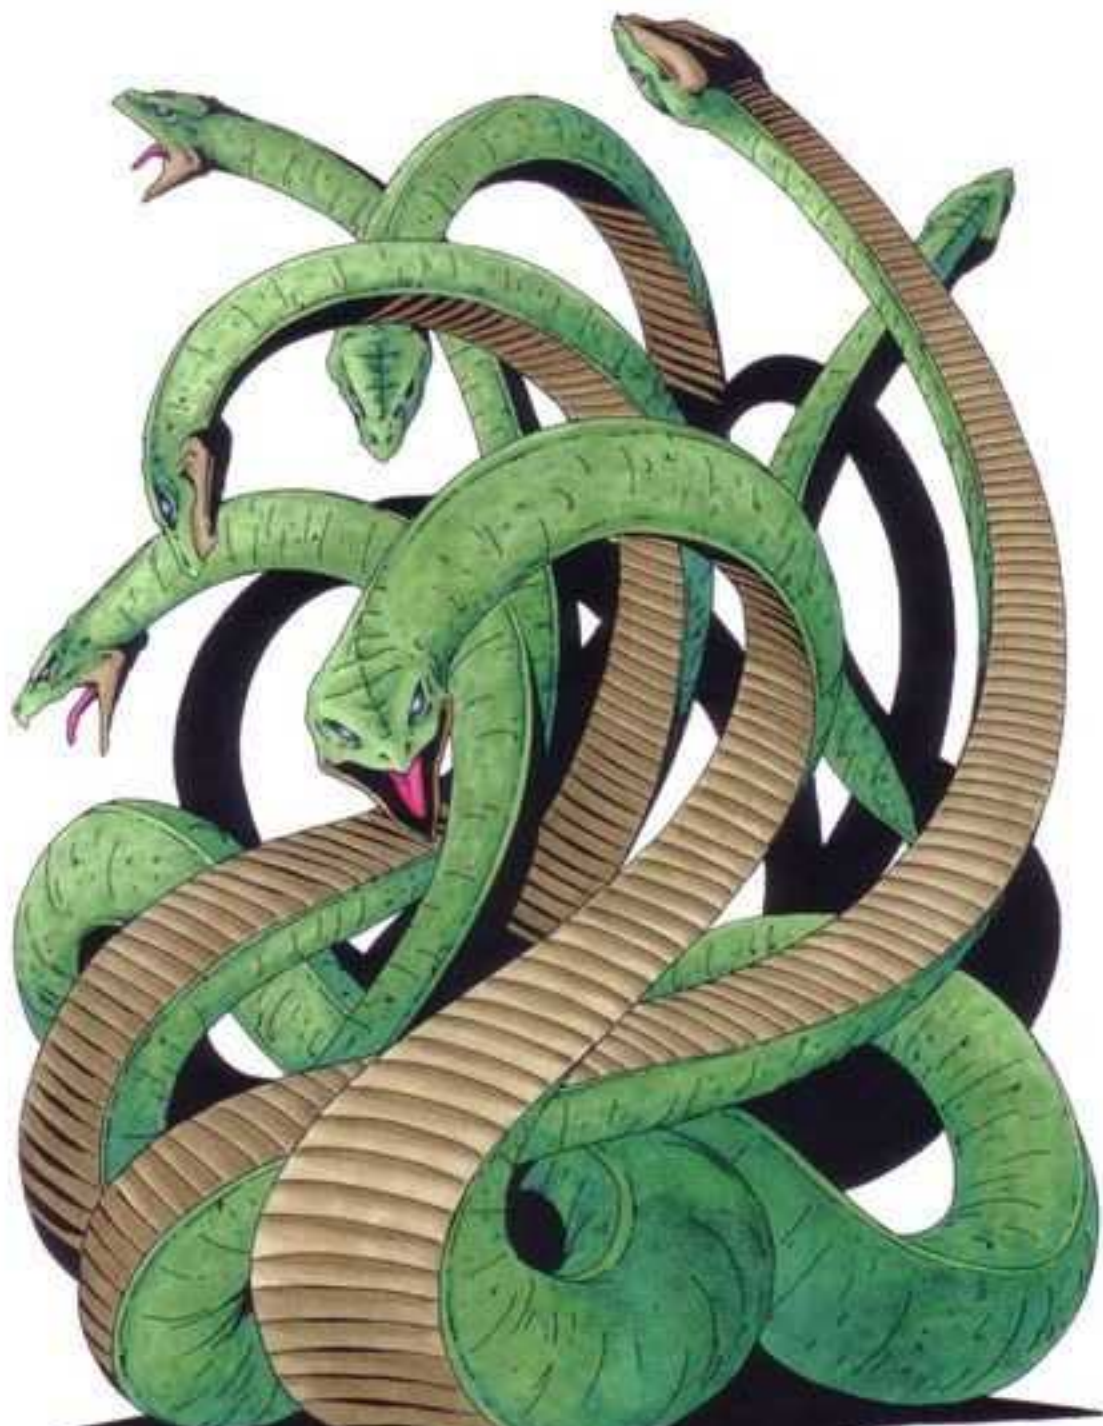

Supplement: supplementary_material [file icon.pdf › Orochi_Supplementary/figures/icon.pdf]

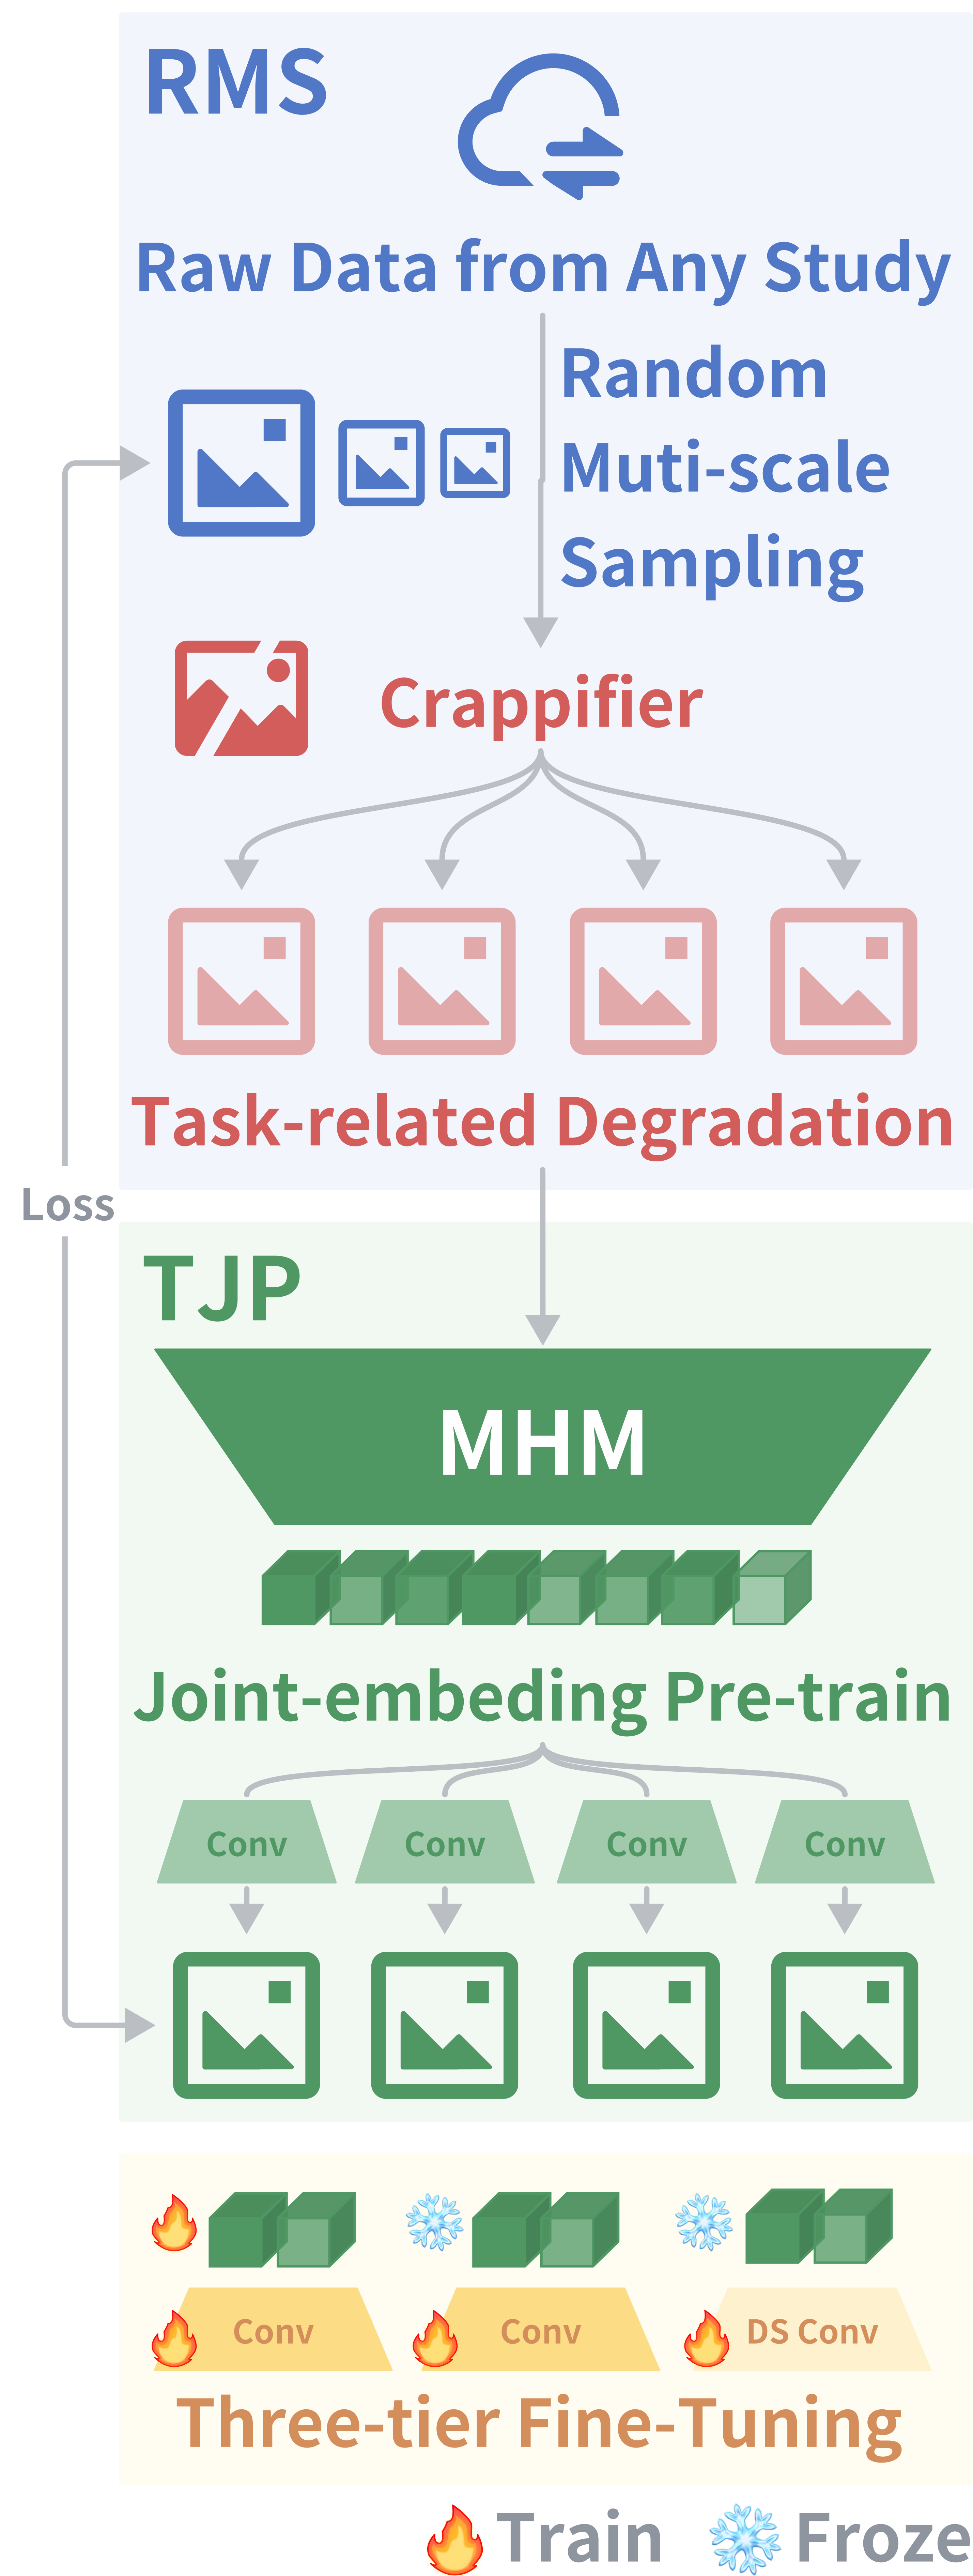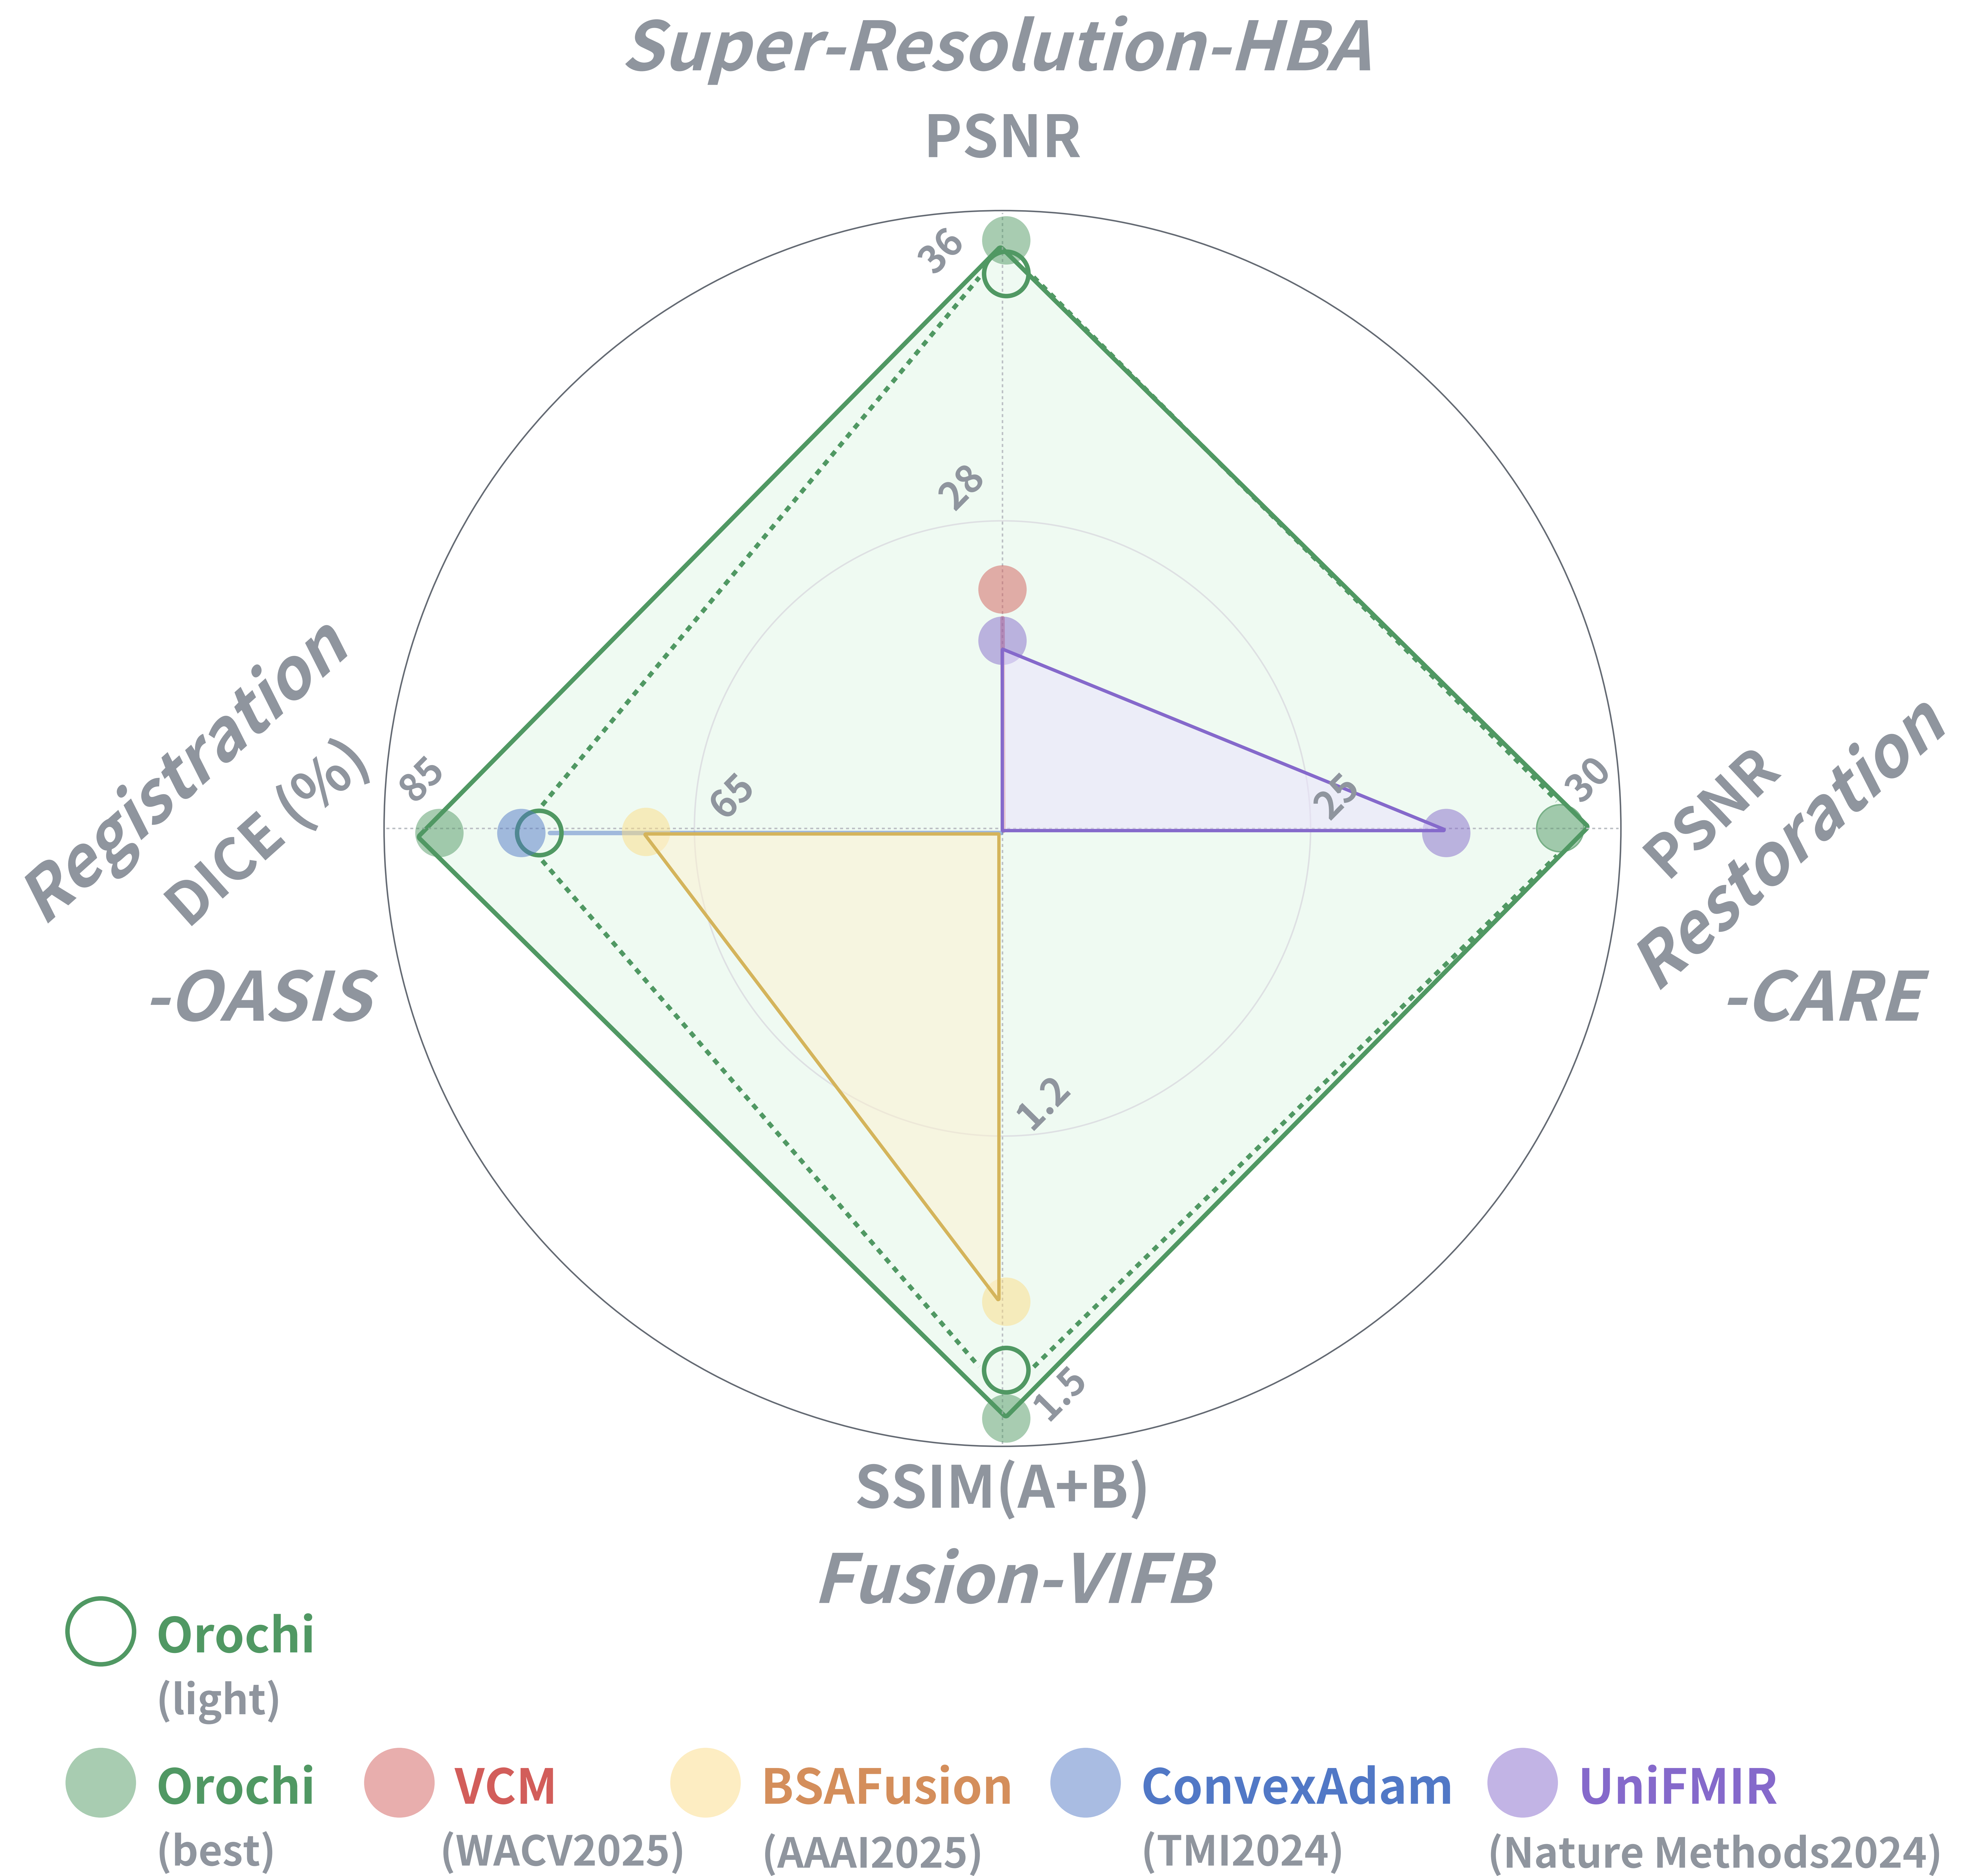

Supplement: supplementary_material [file lidar-multitask-main.pdf › Orochi_Supplementary/figures/lidar-multitask-main.pdf]

(A) : Fusion

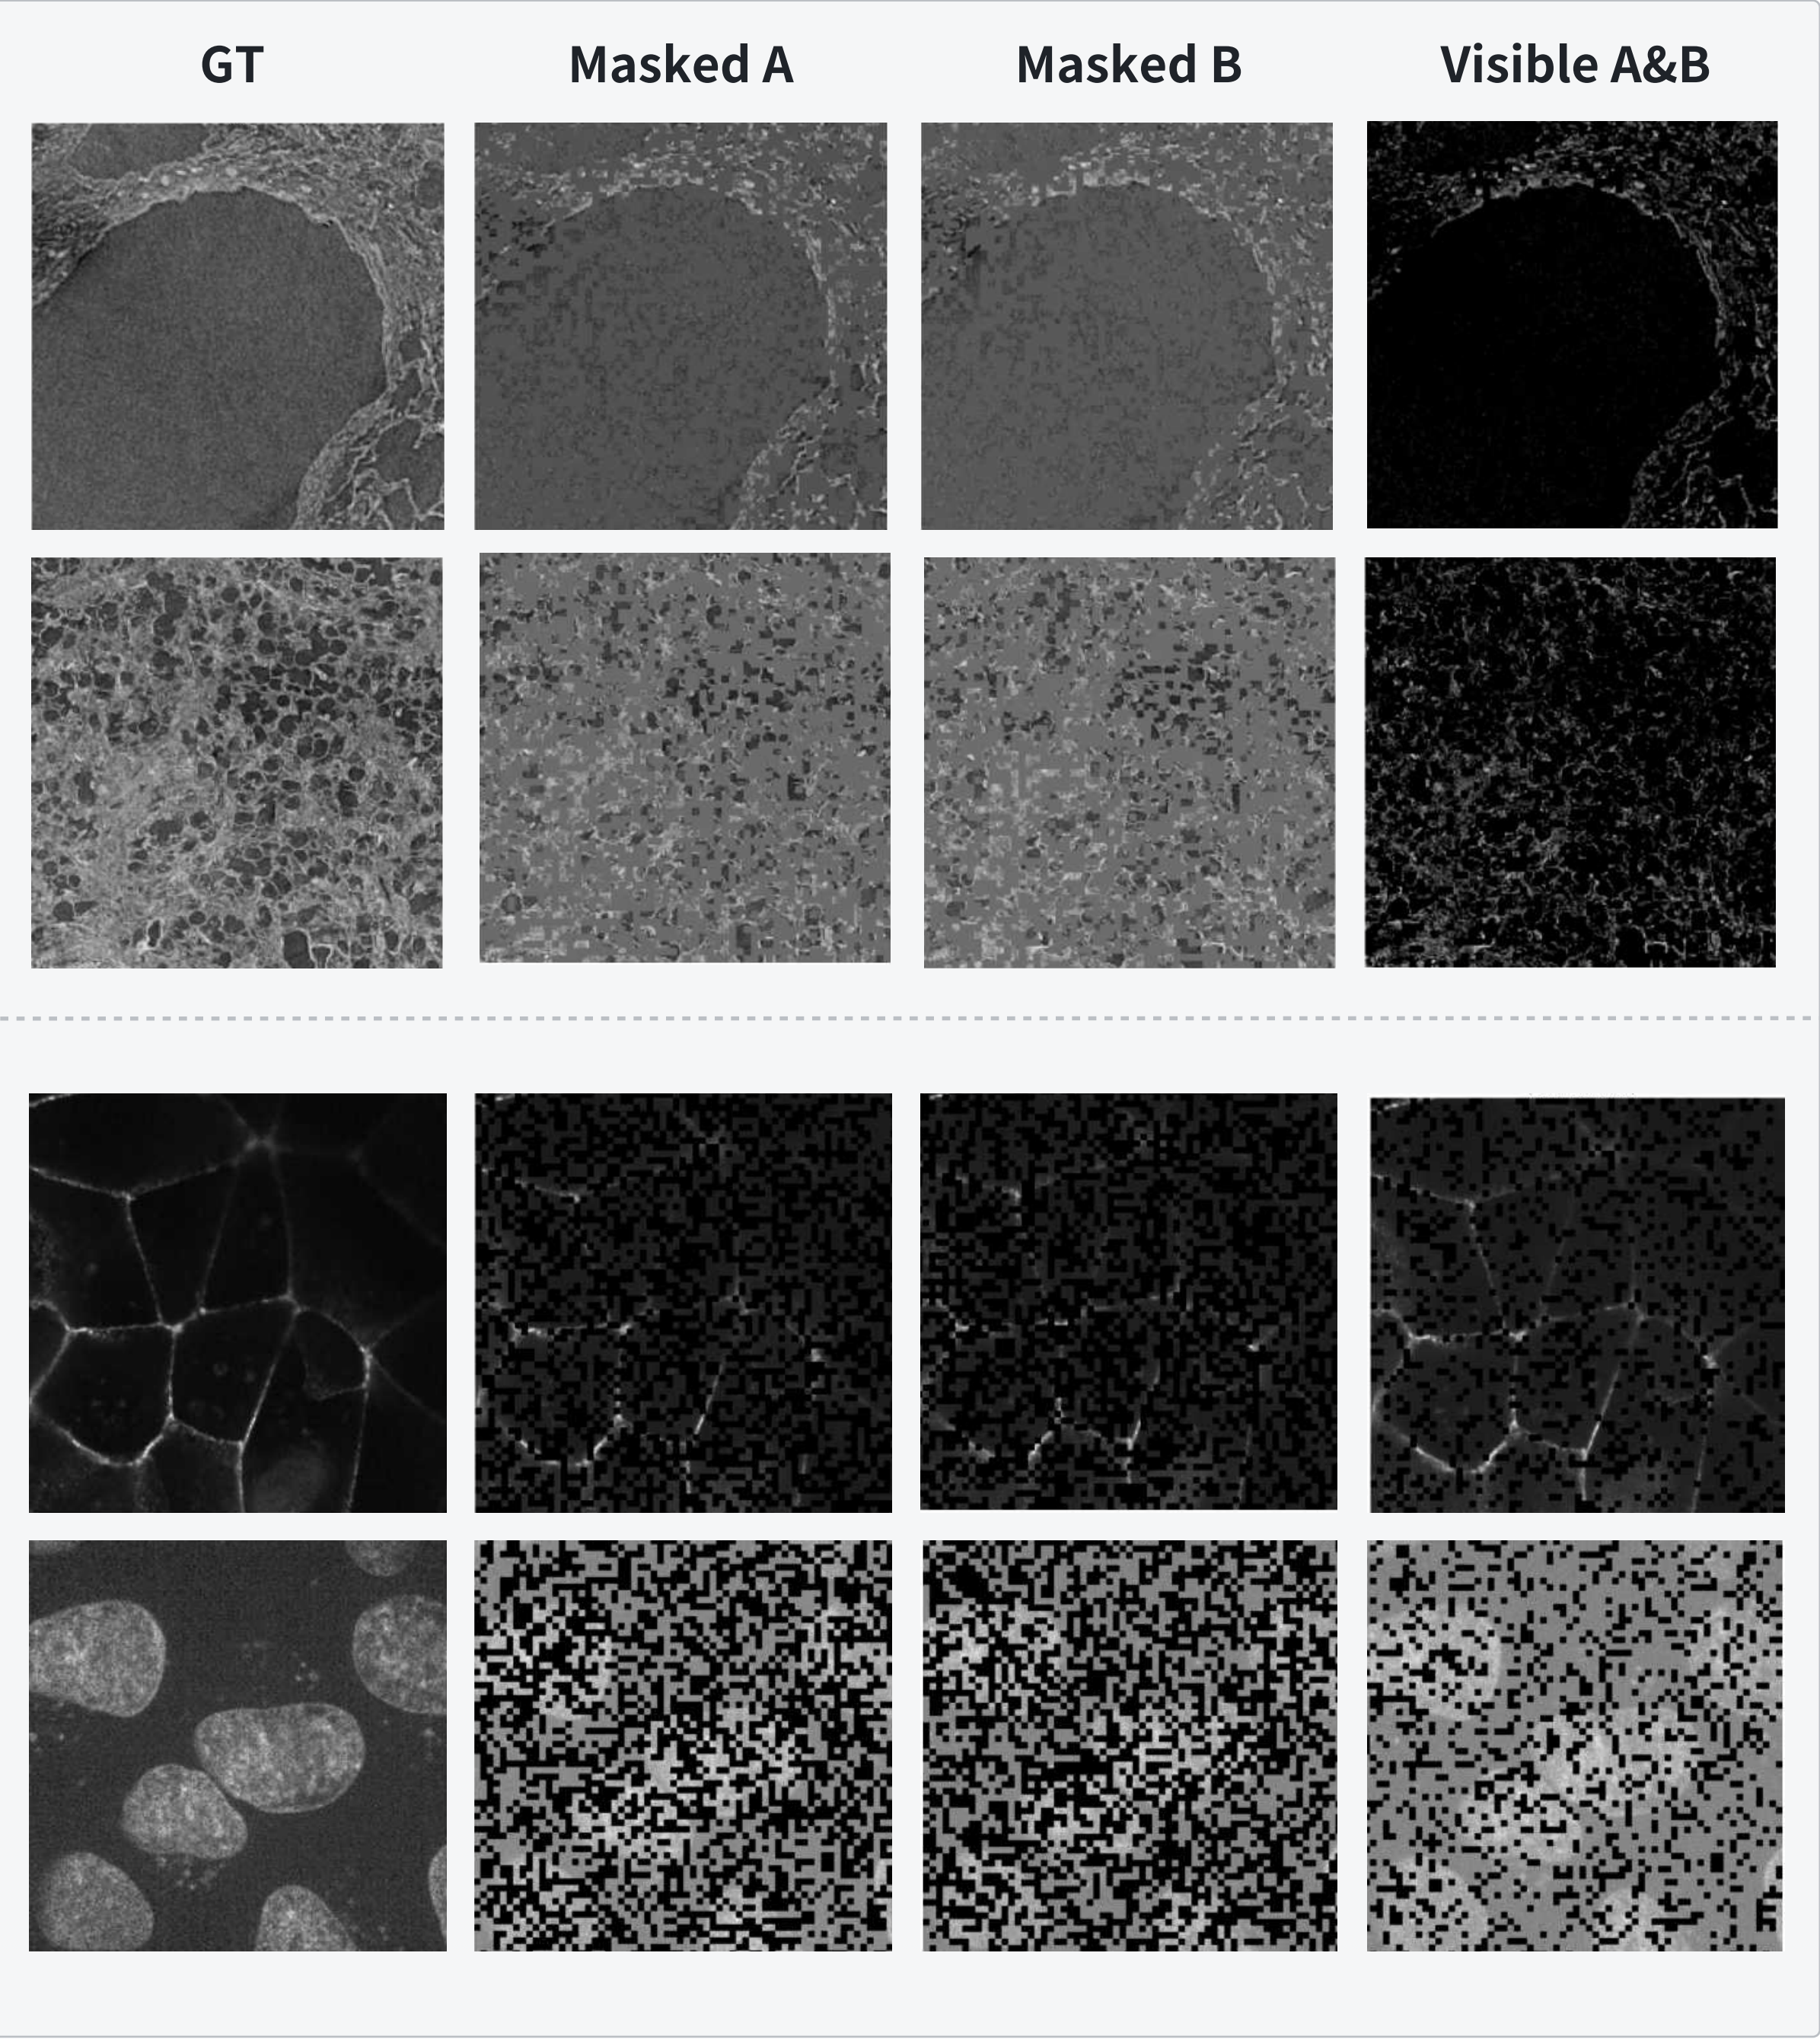

(B) : Restoration

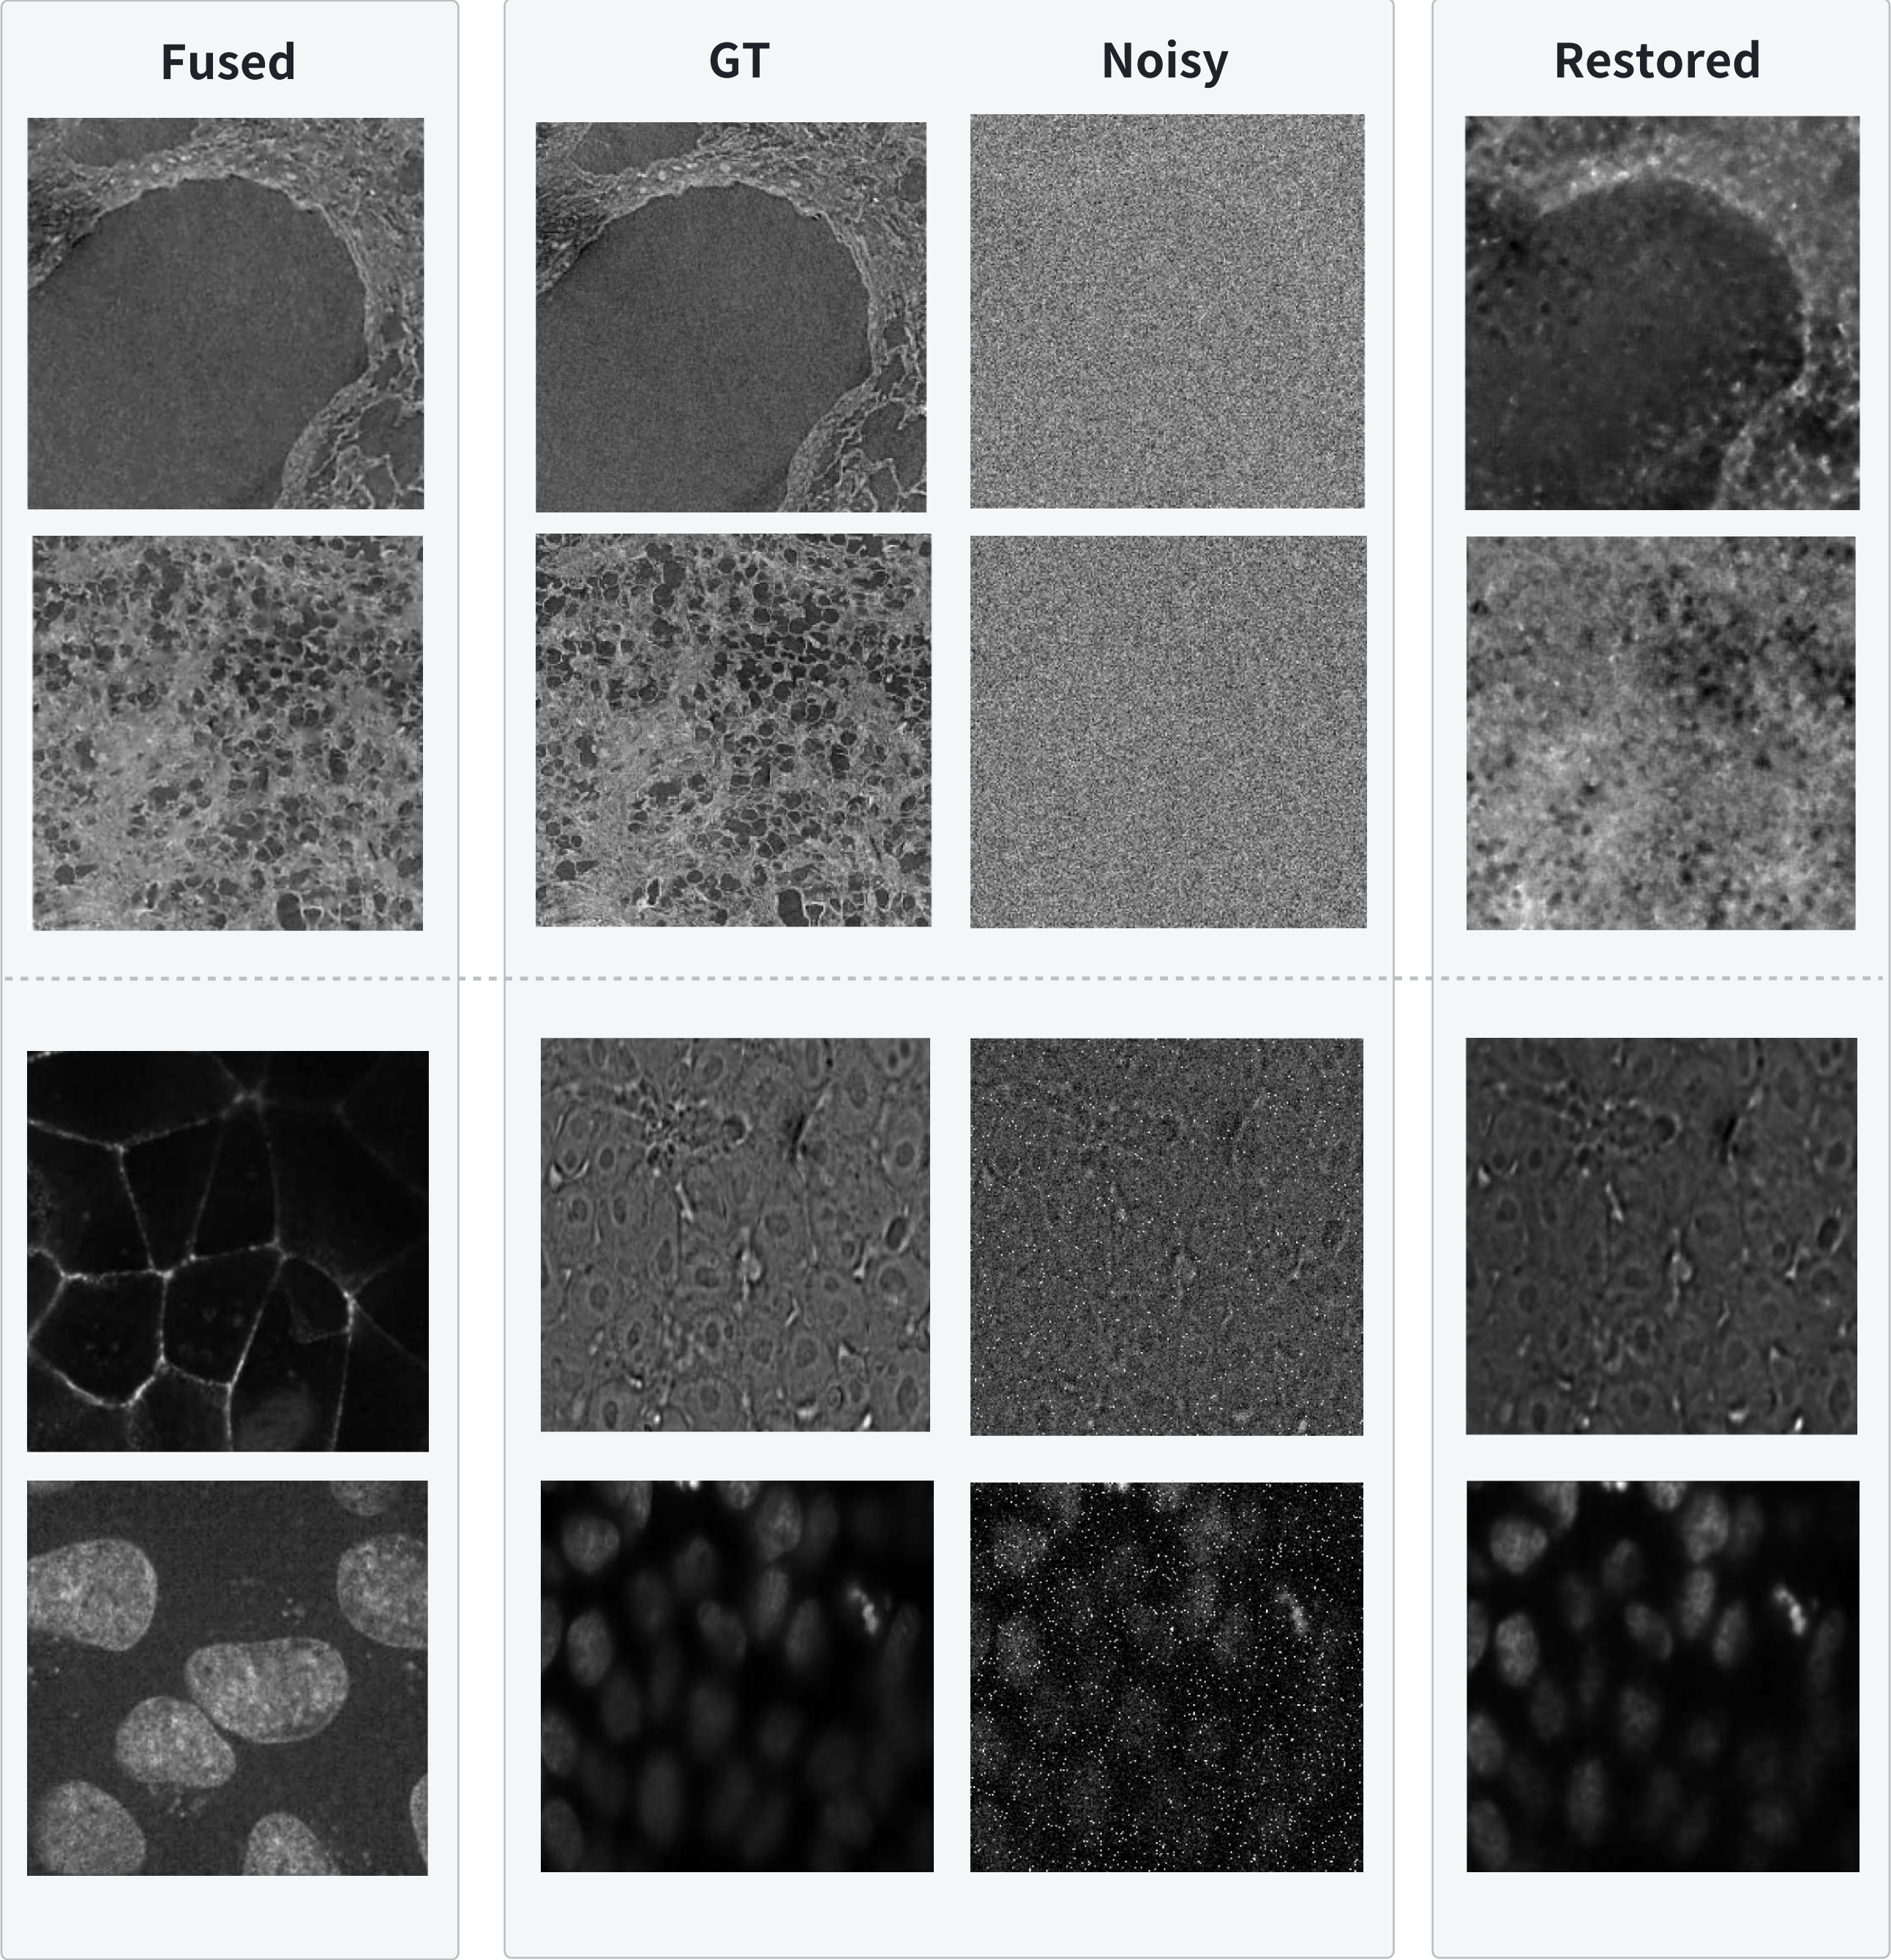

(C) : Registration

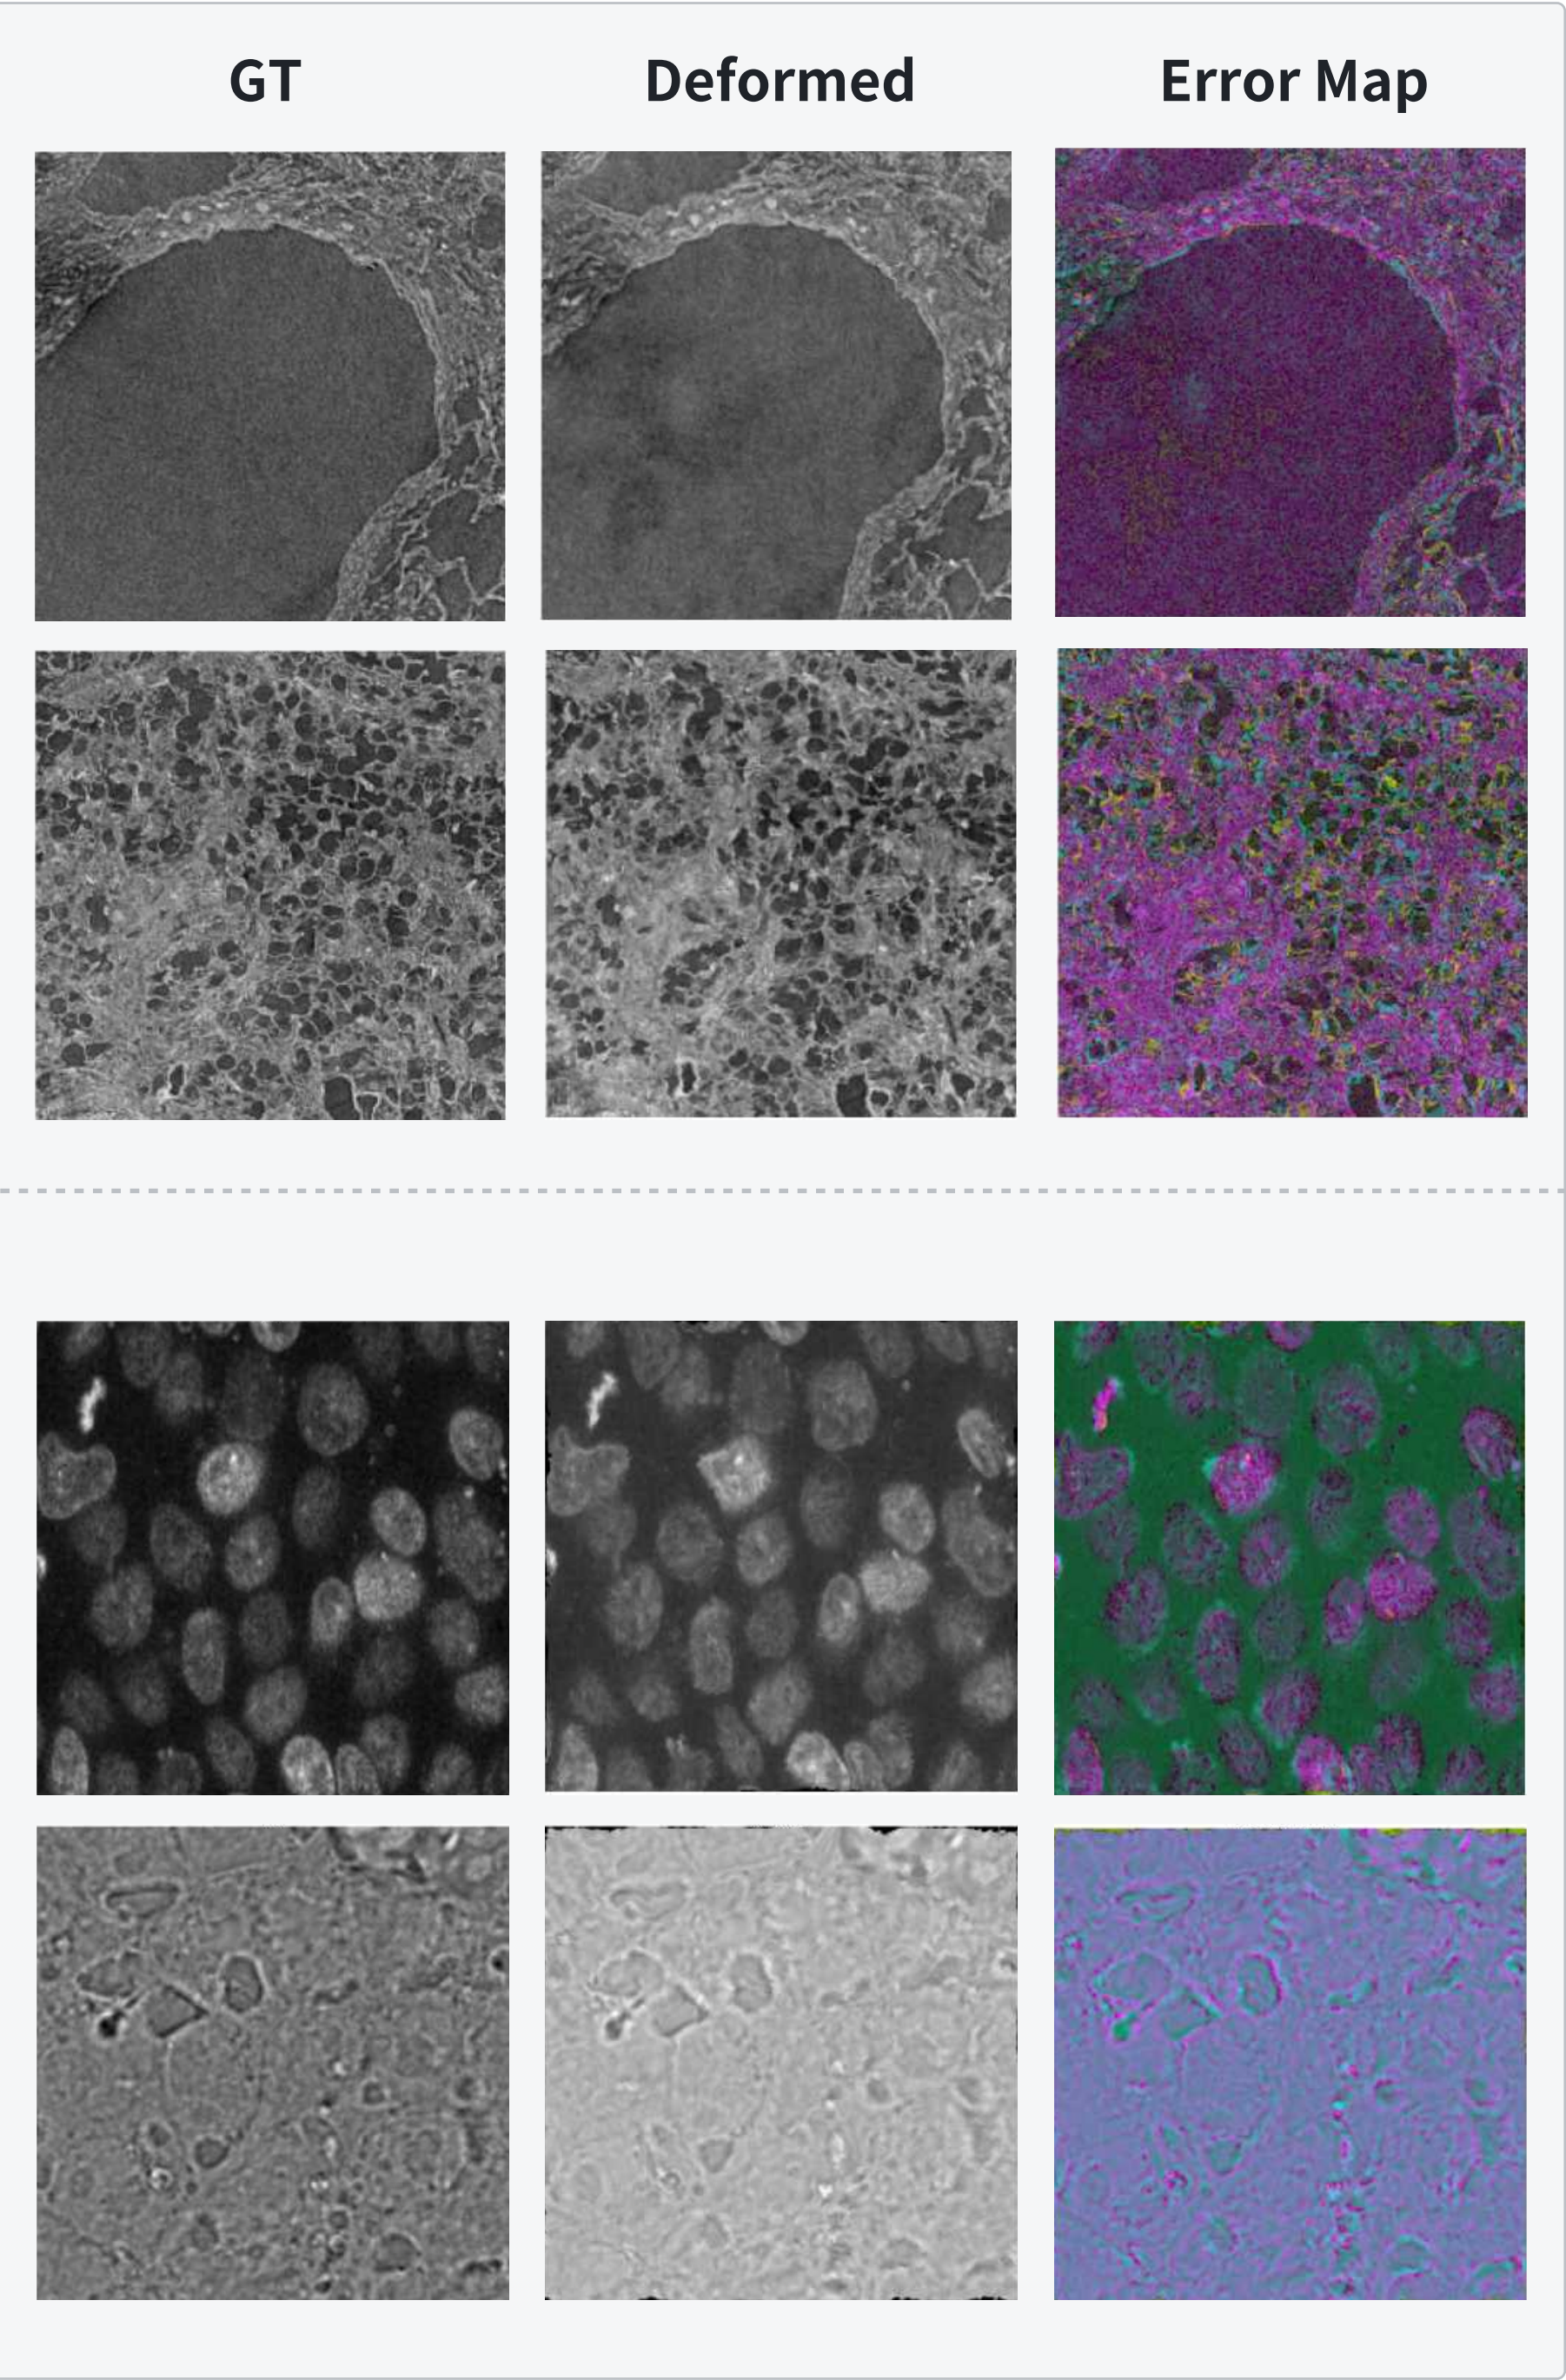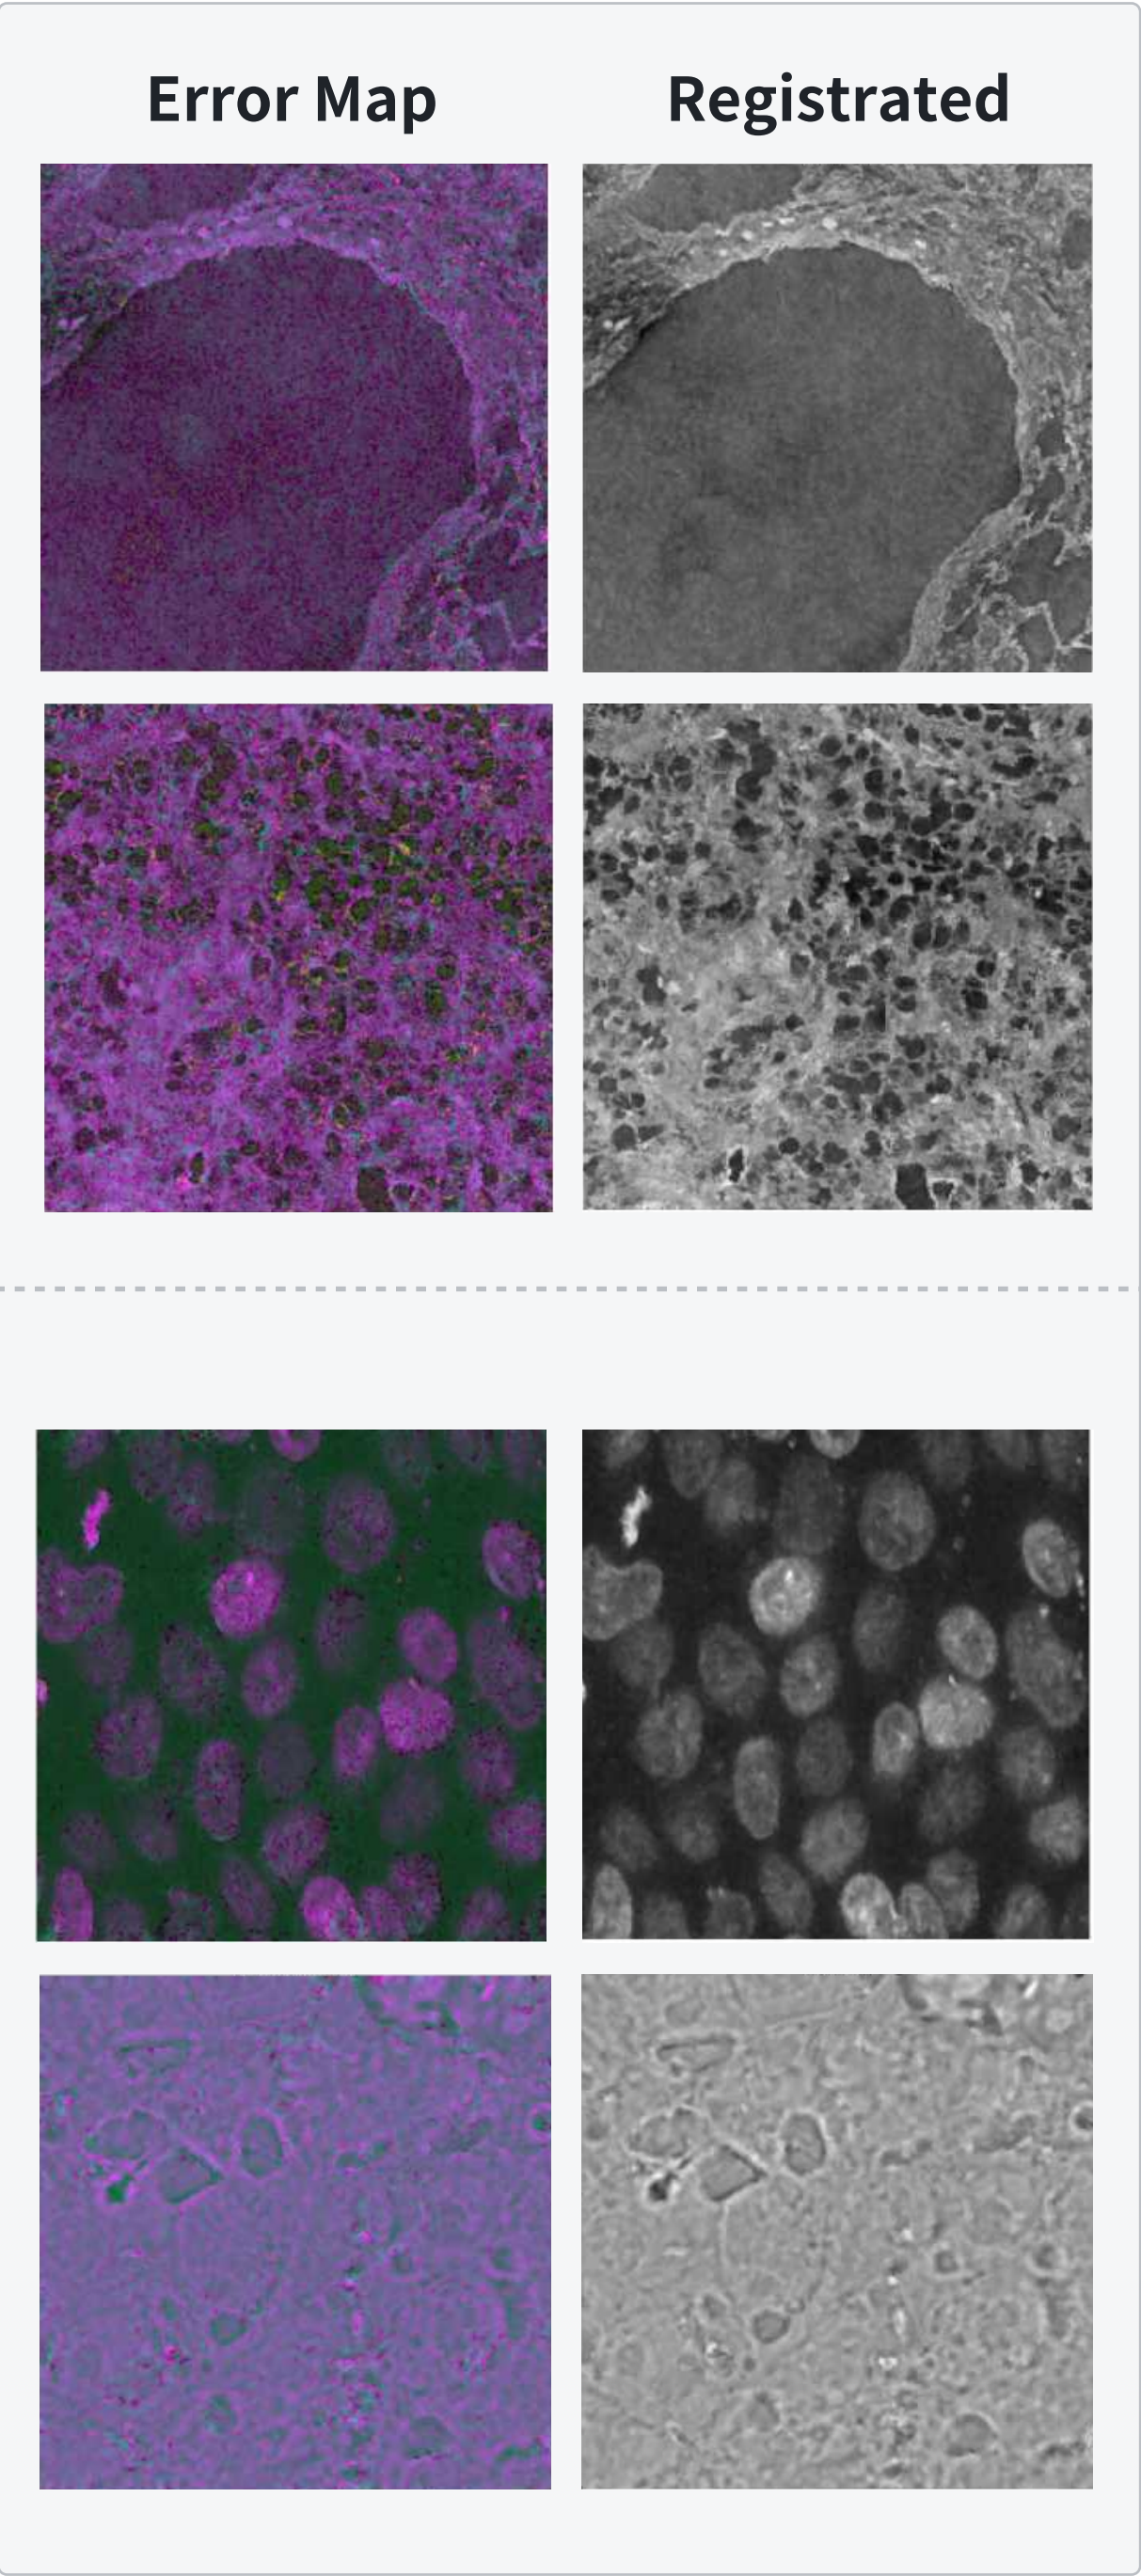

(D) : Super-Resolution

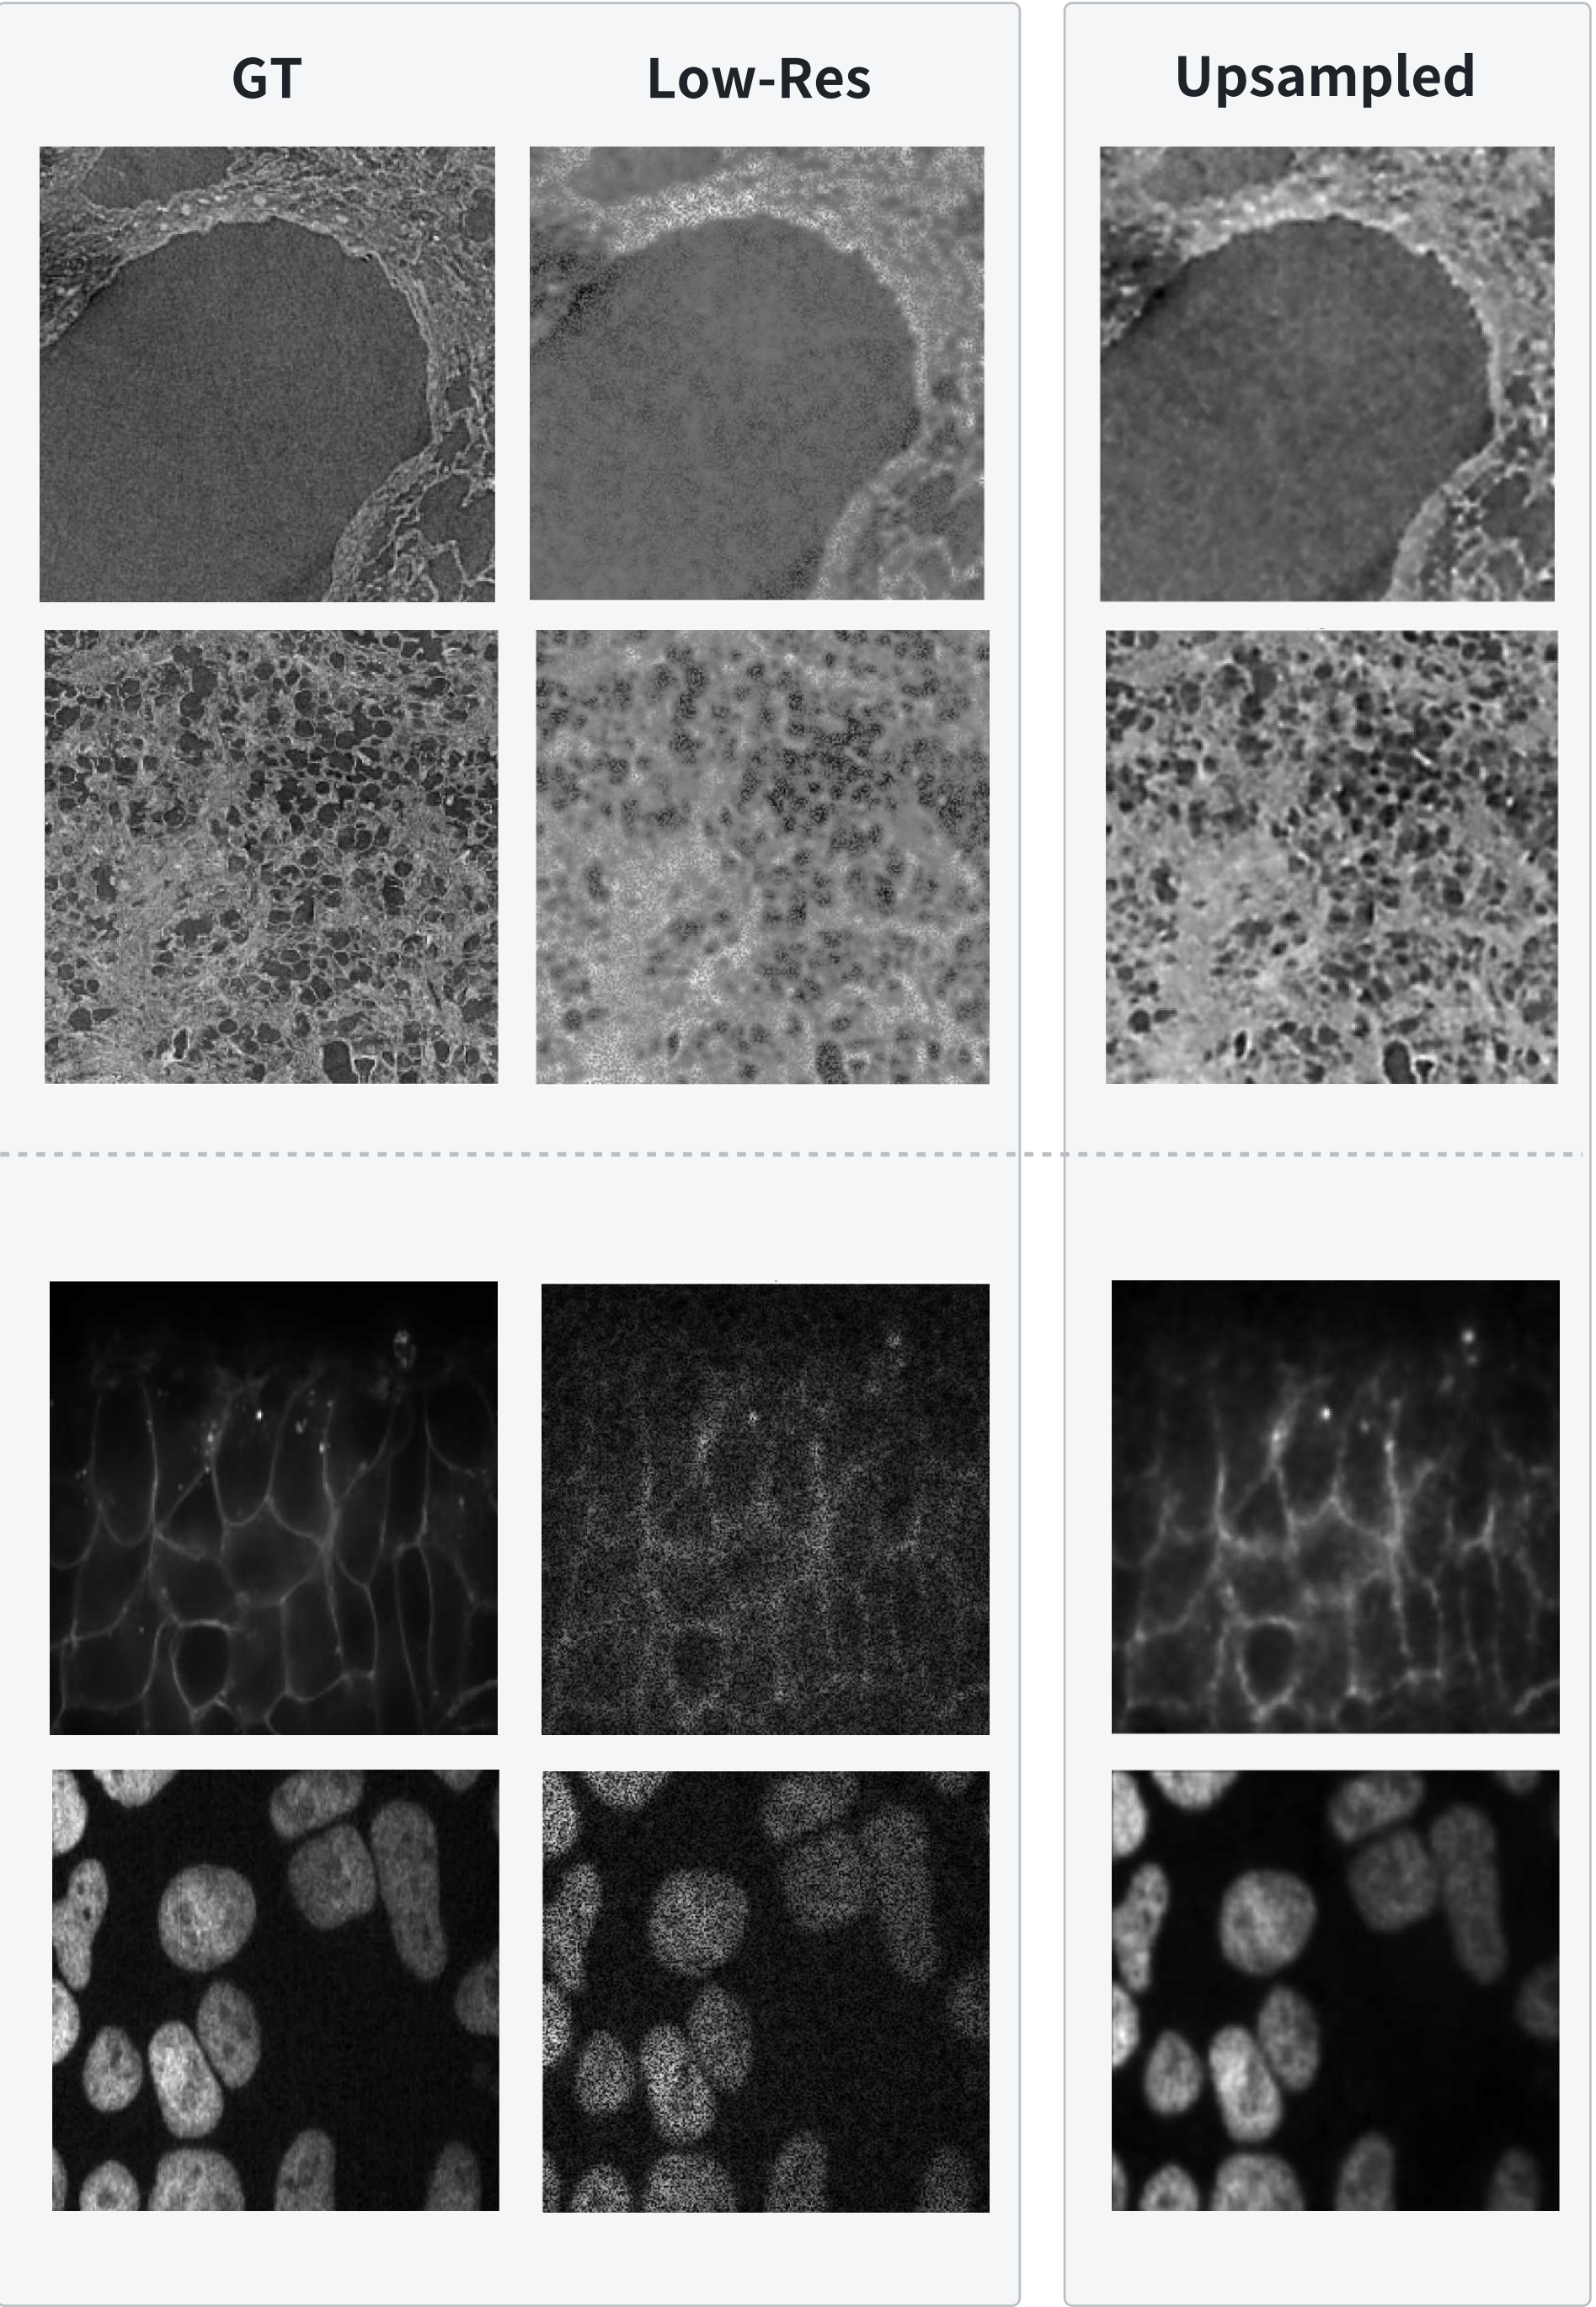

Misalign  Align

Supplement: supplementary_material [file zeroshot-appendix.pdf › Orochi_Supplementary/figures/zeroshot-appendix.pdf]

(A) : Fusion

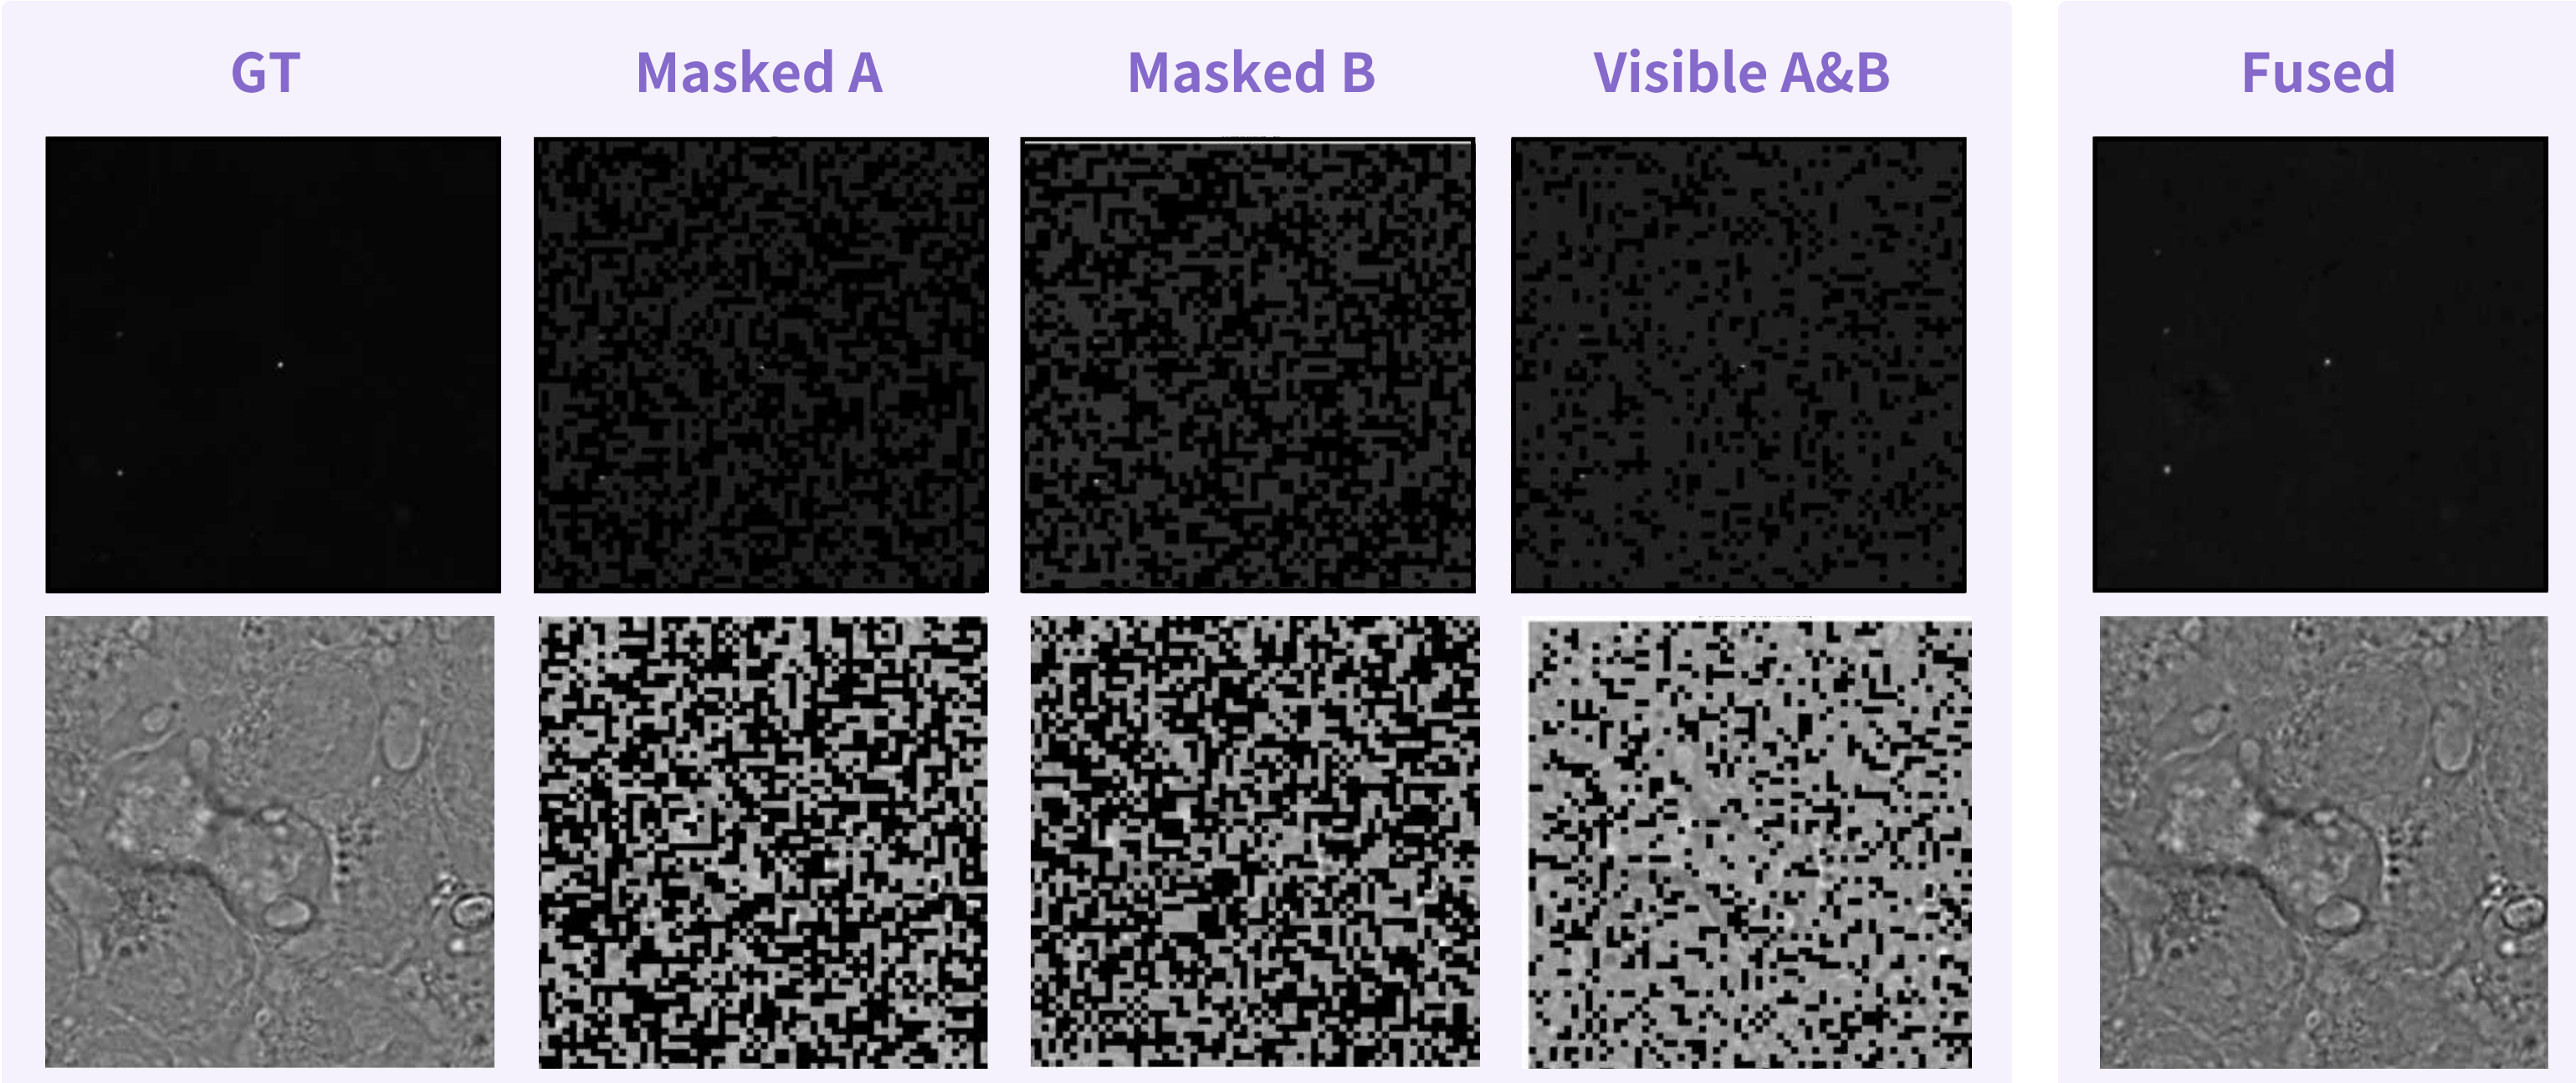

(B) : Restoration

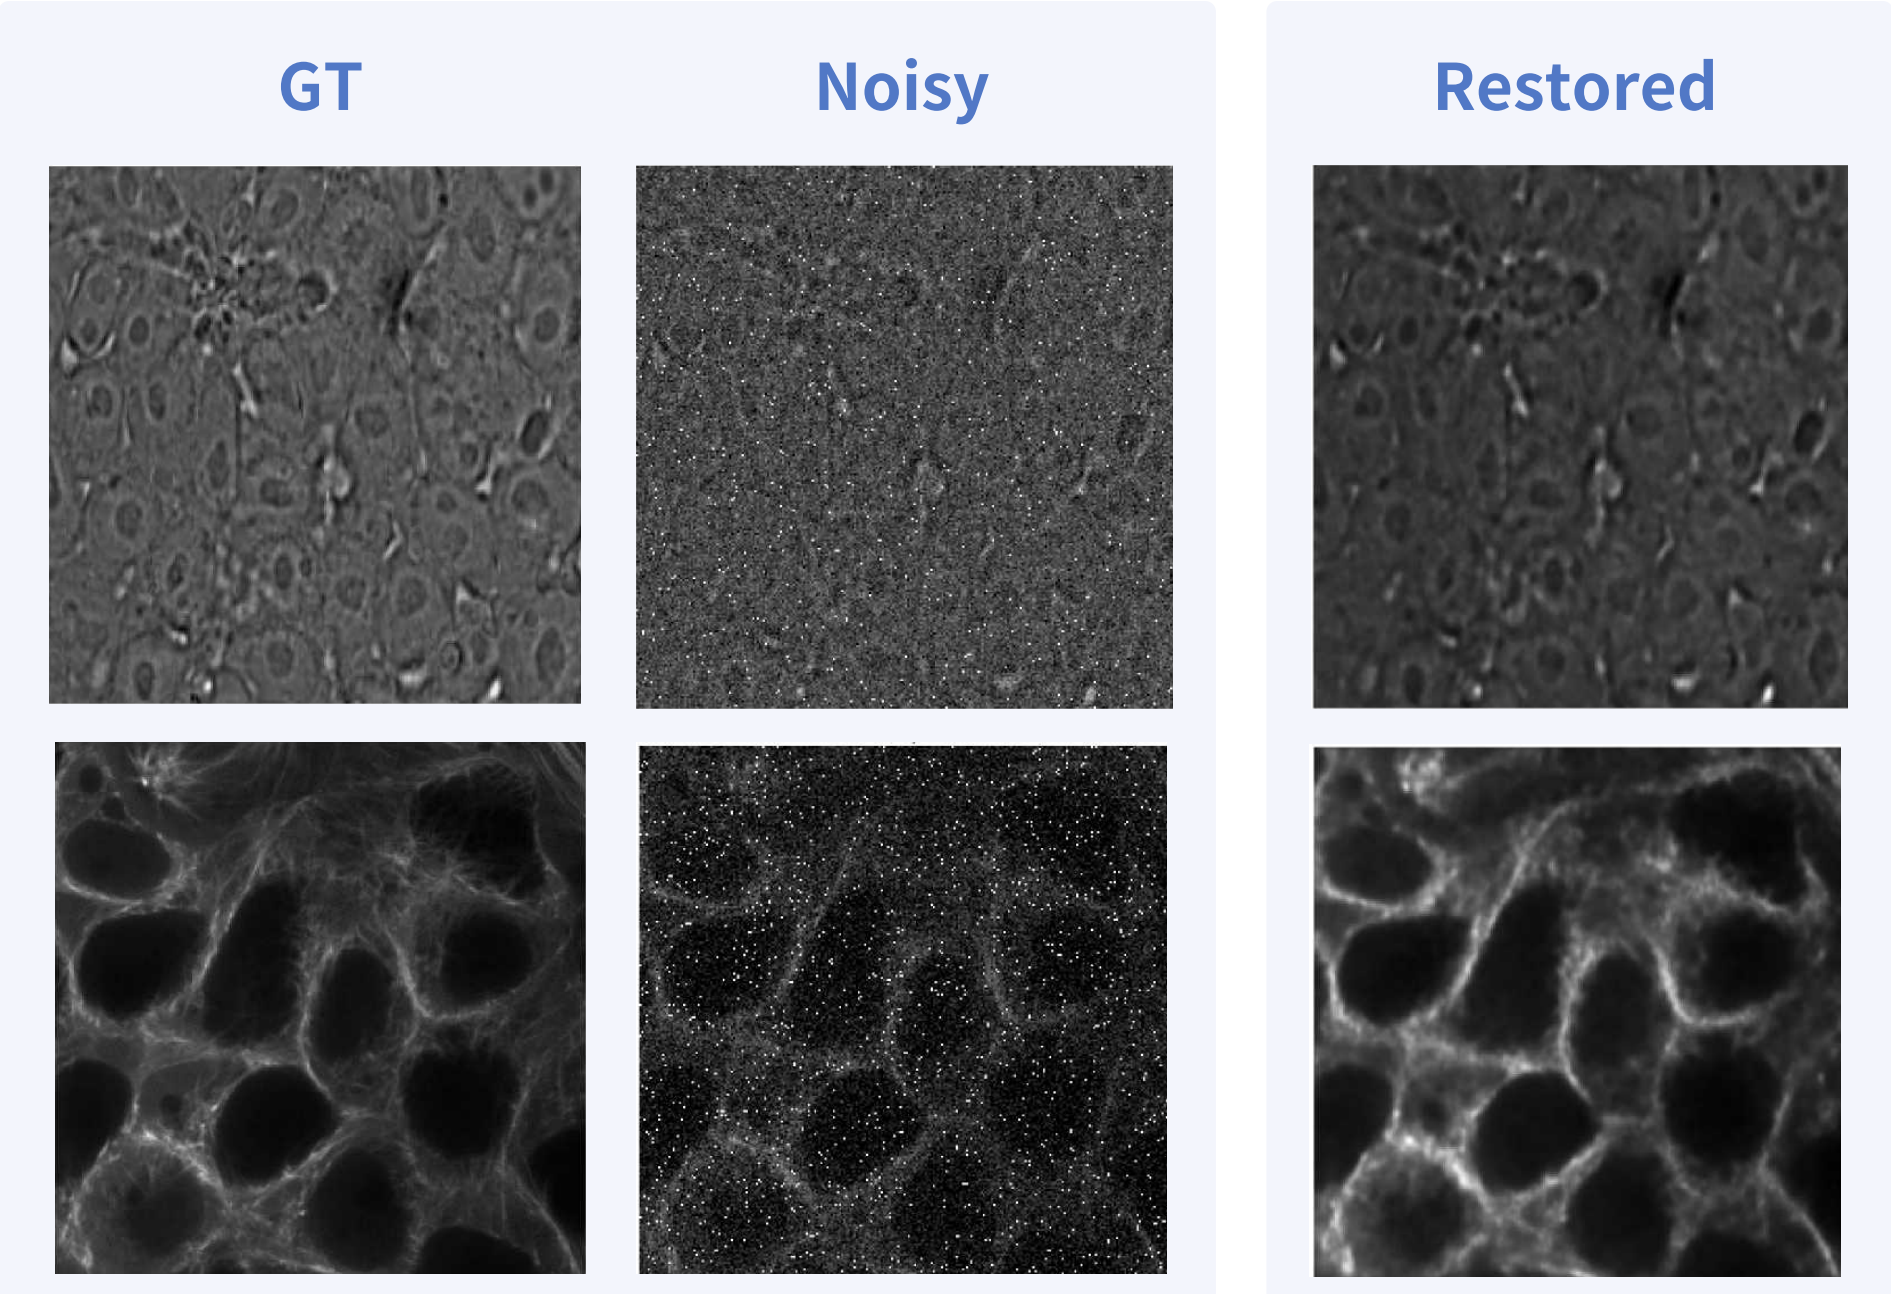

(E) Case Study

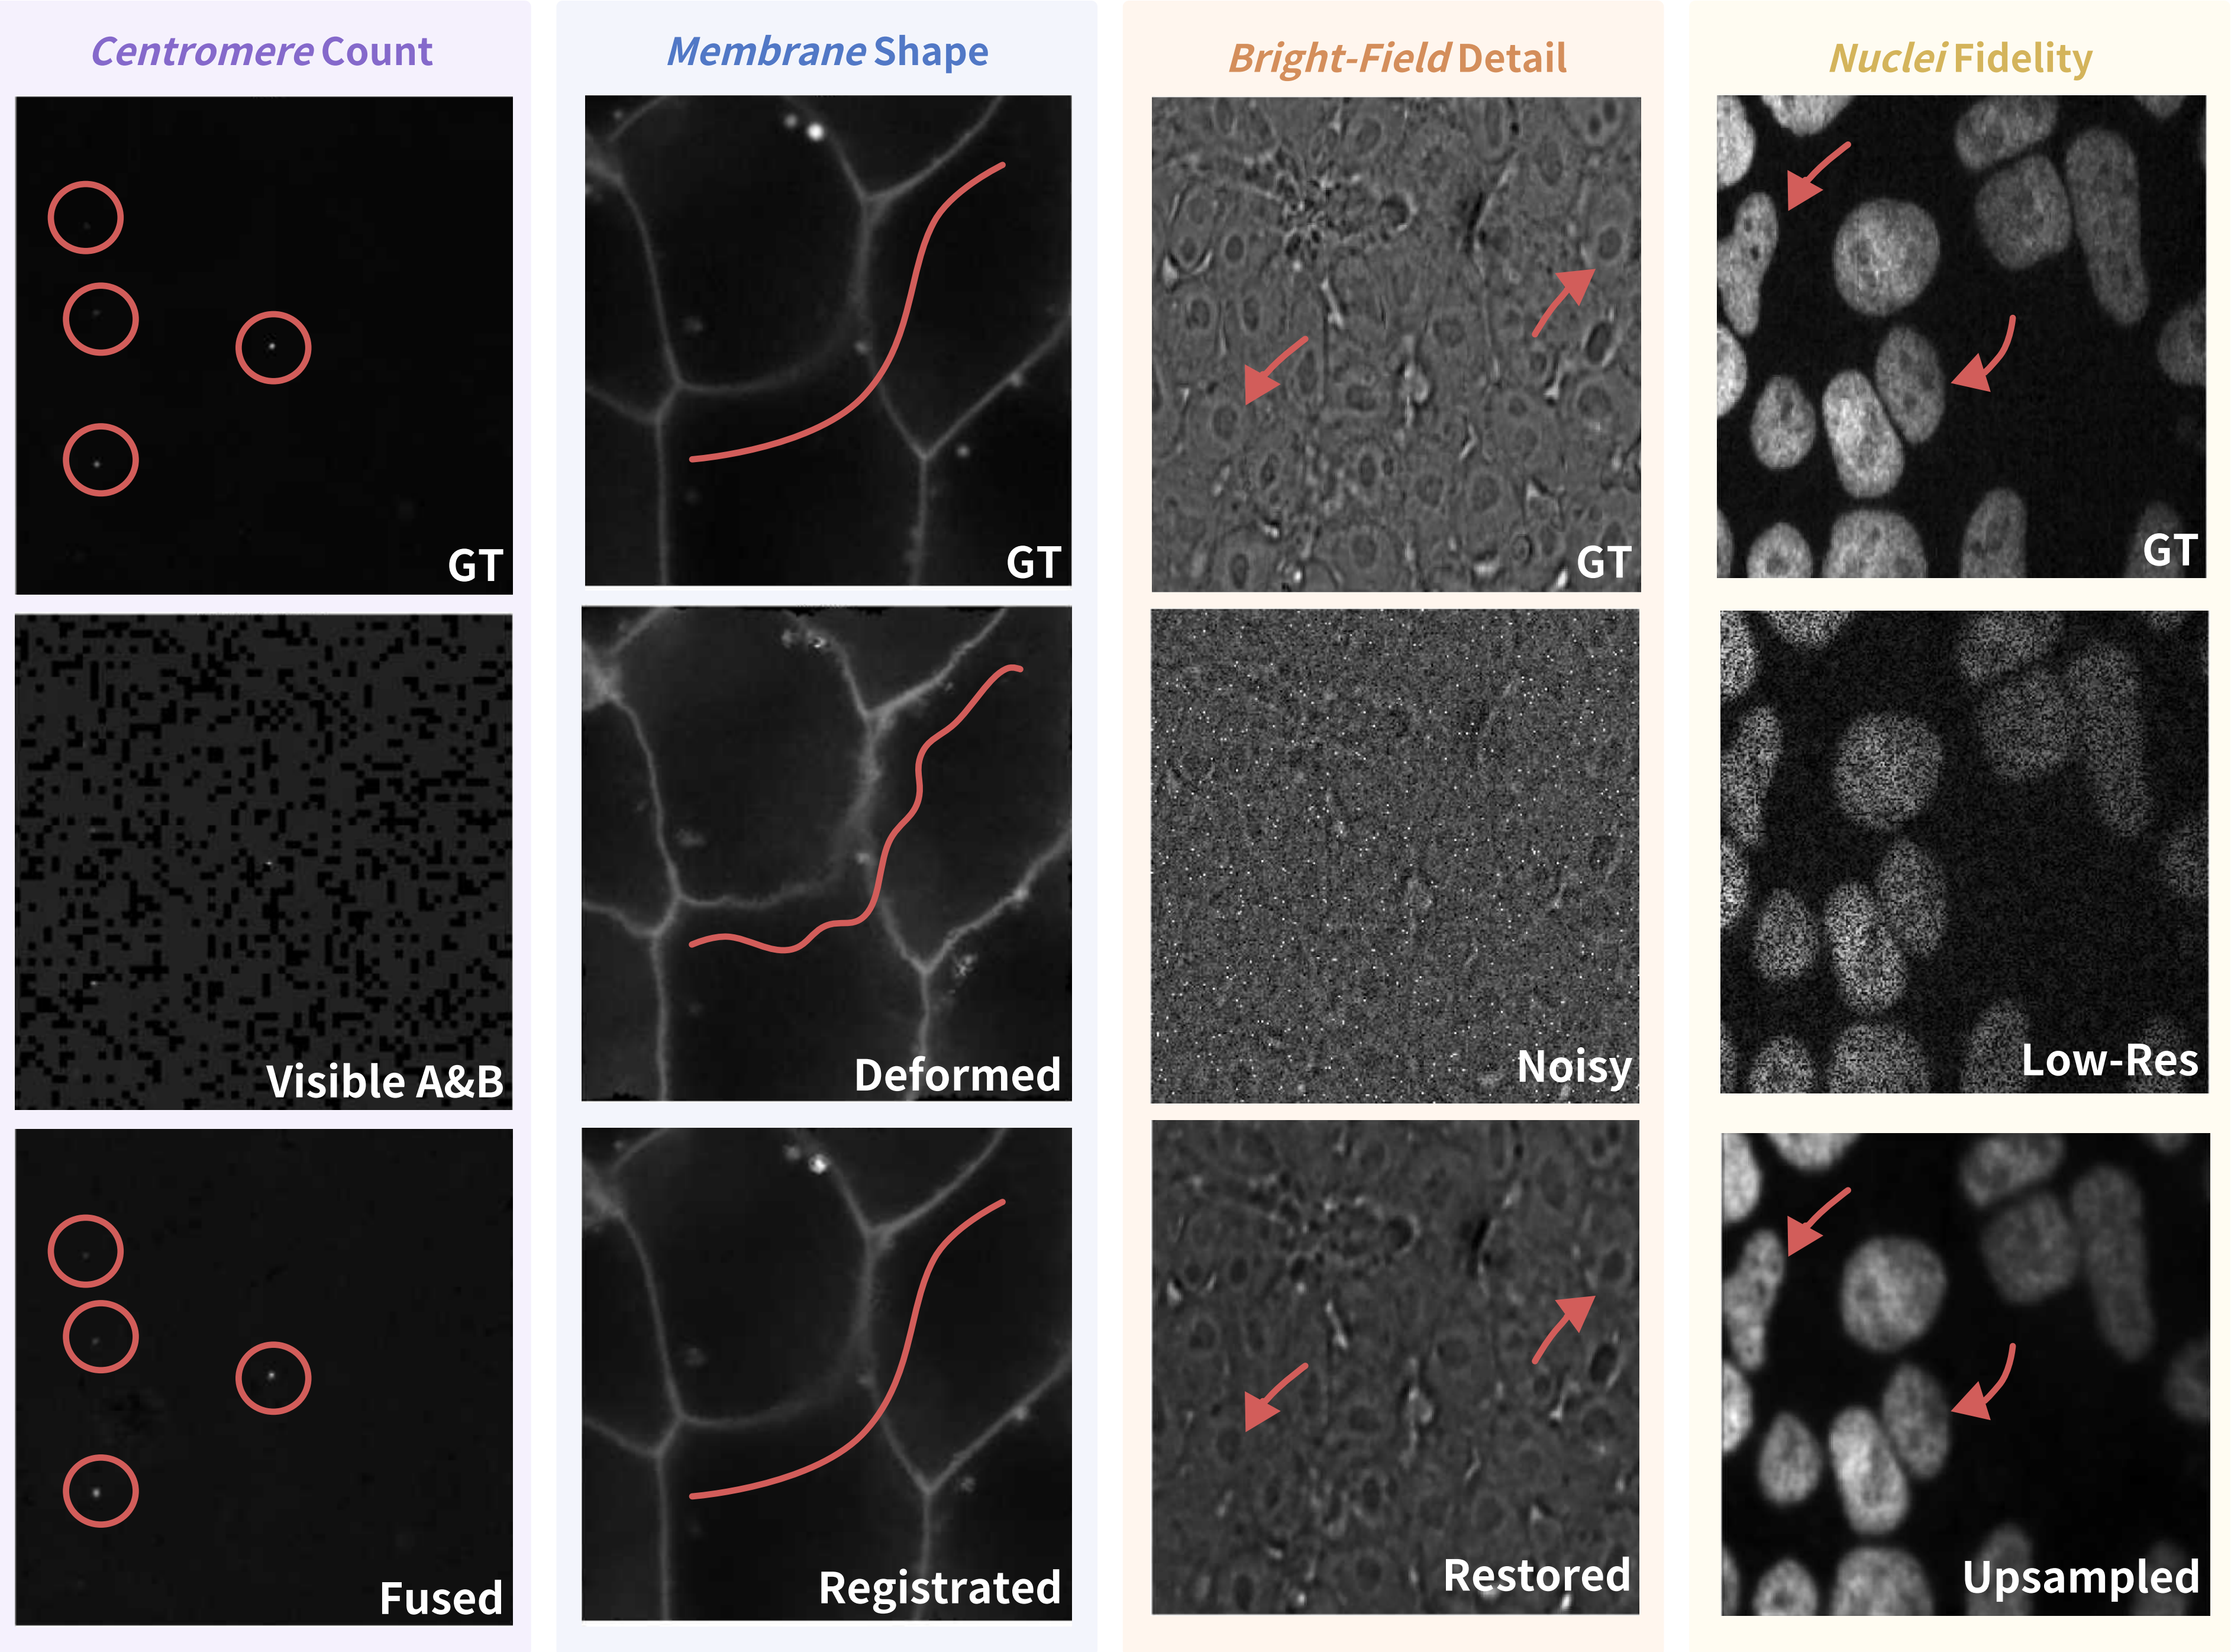

(C) : Registration

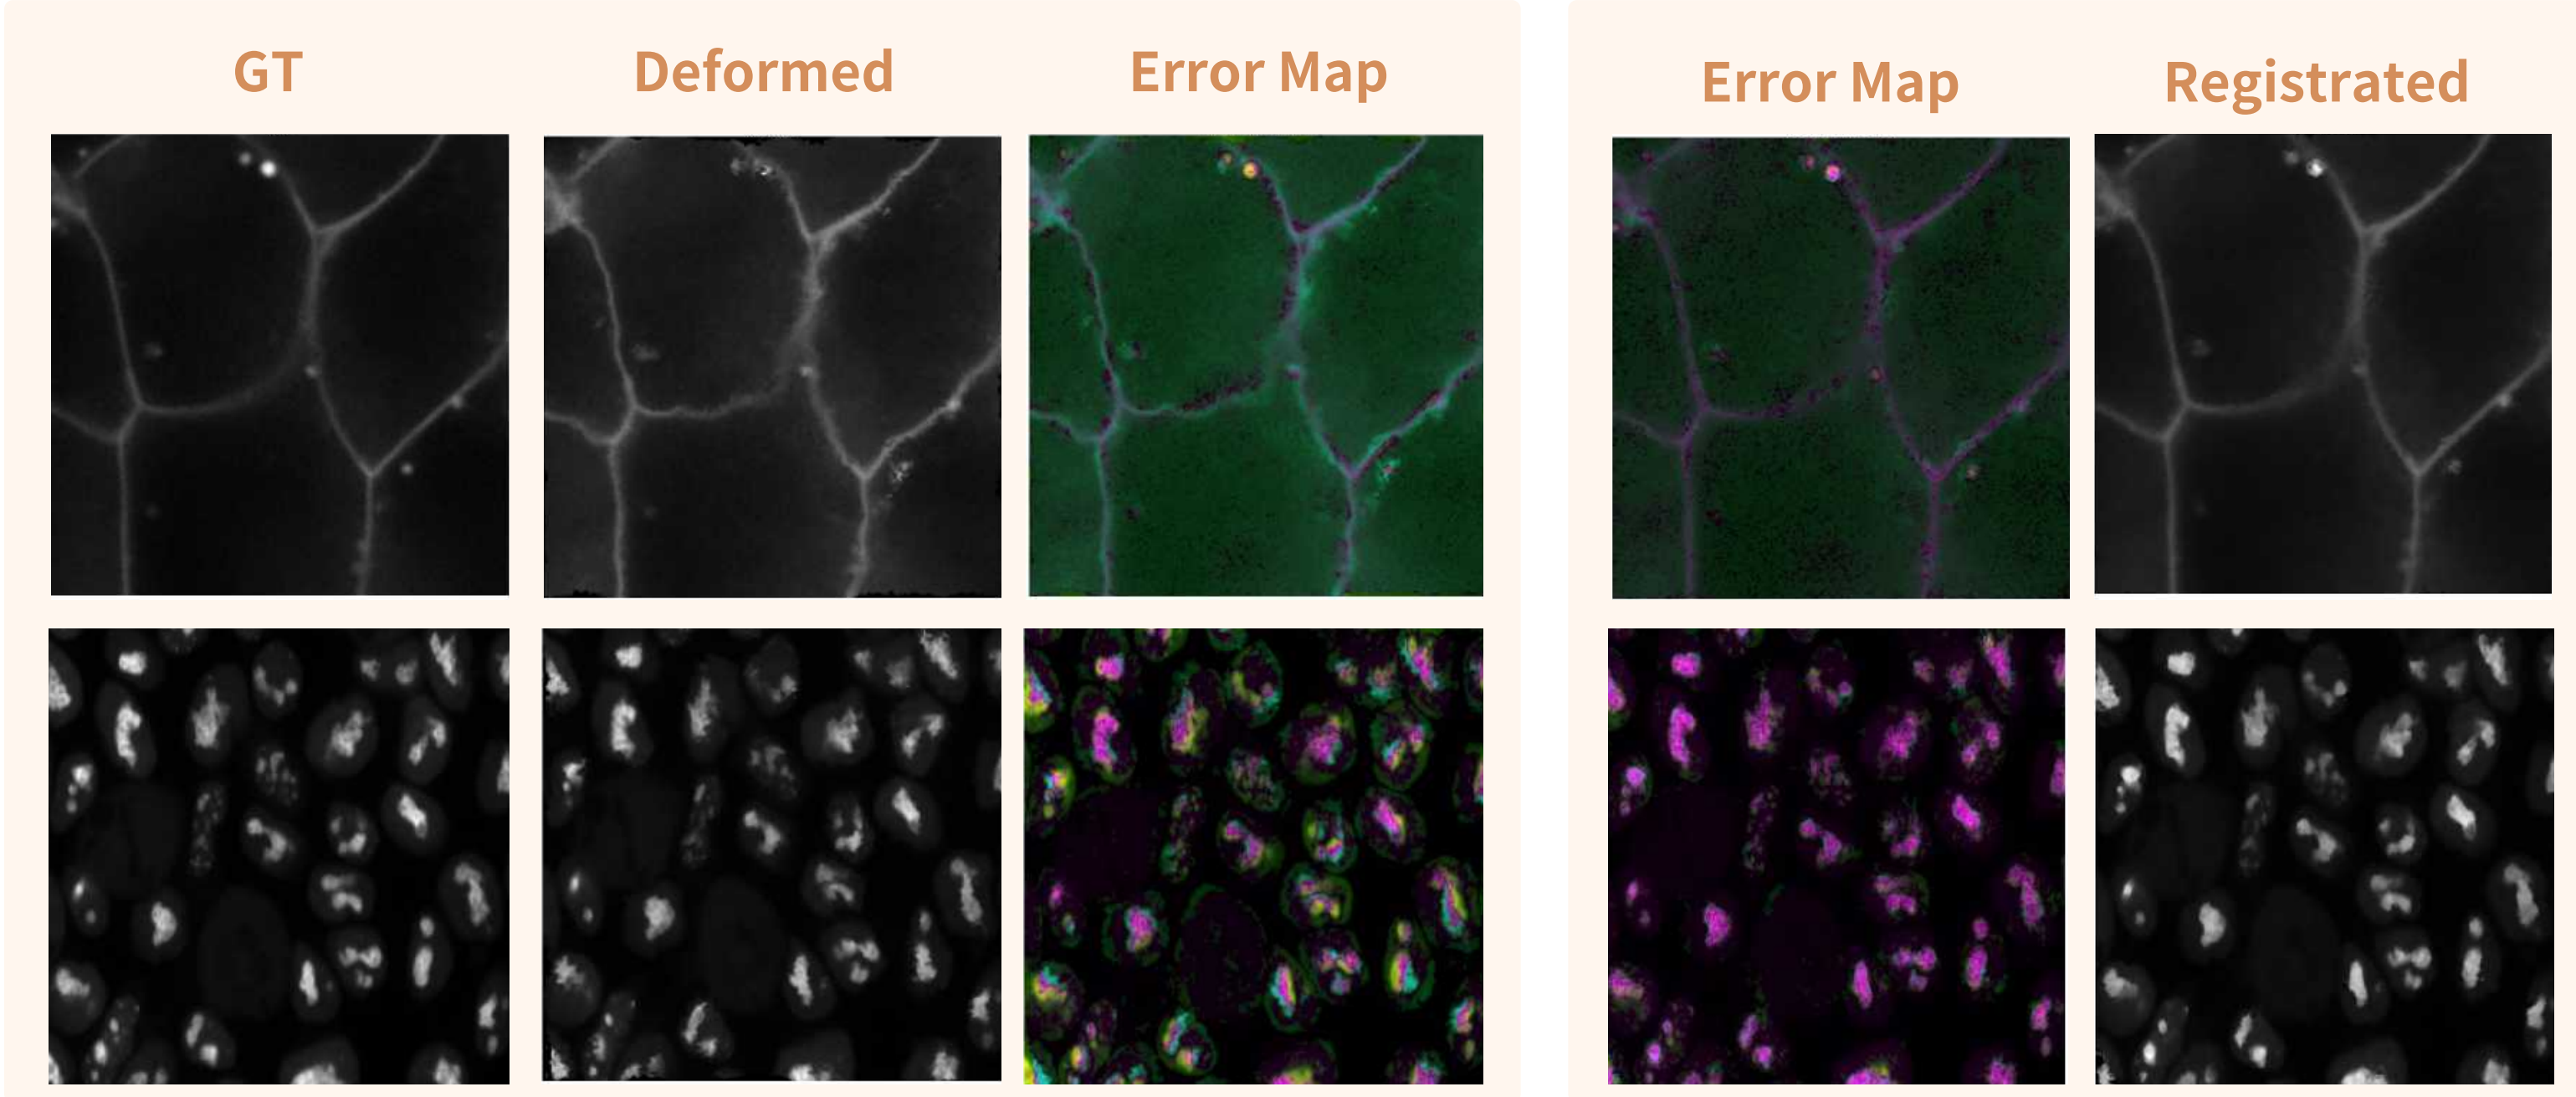

(D) : Super-Resolution

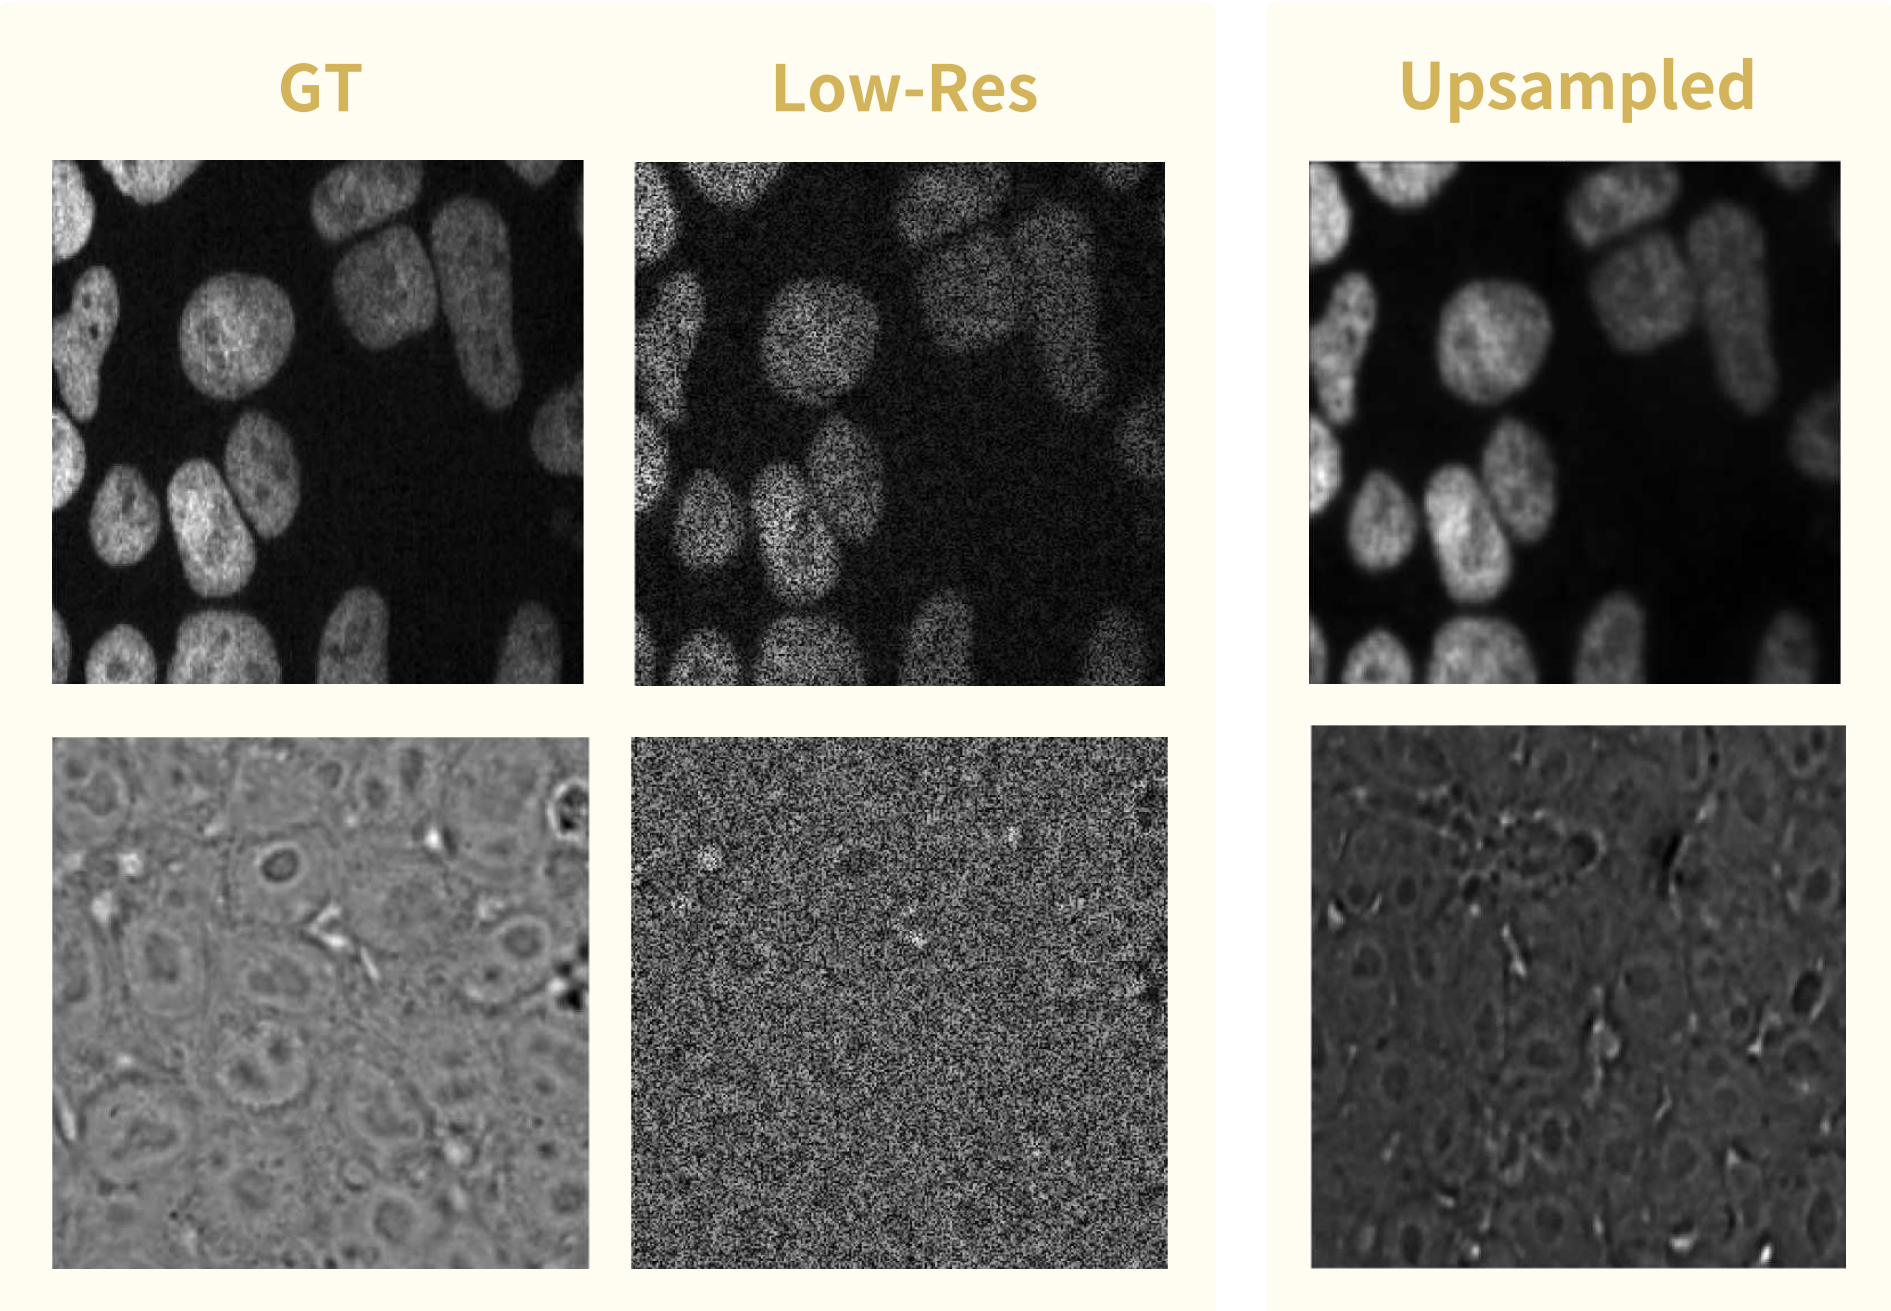

Misalign  Align

Supplement: supplementary_material [file zeroshot-main.pdf › Orochi_Supplementary/figures/zeroshot-main.pdf]
